# Supplementary material
Source: HighWire-hosted journal article supplement (https://erj.ersjournals.com/content/59/2/2101341)

**Table of contents**

Case Report Form (CRF) of Initial Survey: First Follow-Up Time Point version 1.0 ..... 2

Table S1. Categorisation of persistent symptoms at follow-up. .... 25

Table S2. Symptoms at the time of hospital admission..... 25

Table S4. Parental perception of mood and behaviour changes in their children. .... 29

Table S5. Parental-reported mood and behaviour changes due to Covid-19 and pandemic in their children, stratified by the the effect. .... 30

Figure S1. The proportion of COVID-19 infected children who at various time points after discharge from hospital had one or more of the commonest continuing symptoms. Some children had more than one symptom. .... 31

Figure S2. Multivariable logistic regression model to identify pre-existing risk factors for post-COVID condition (using age as a continuous variable). Odds ratios and 95% CIs for presence of (A) any category of persistent symptoms at the time of follow-up and (B) two or more co-existing categories of persistent symptoms at the time of the follow-up. .... 32

Figure S3. Multivariable logistic regression model to identify pre-existing risk factors for post-COVID condition (subgroup analyses in children  $\geq 6$  years of age). Odds ratios and 95% CIs for presence of (A) any category of persistent symptoms at the time of follow-up and (B) two or more co-existing categories of persistent symptoms at the time of the follow-up. .... 33

Case Report Form (CRF) of Initial Survey: First Follow-Up Time Point version 1.0

The questions were answered by the:

Mother/female caregiver  Father/male caregiver

Date you completed the survey (DD/MM/YYYY): [\_D\_] [\_D\_] / [\_M\_] [\_M\_] / [\_2\_] [\_0\_] [\_Y\_] [\_Y\_]

What is your child's date of birth (DD/MM/YYYY): [\_D\_] [\_D\_] / [\_M\_] [\_M\_] / [\_Y\_] [\_Y\_] [\_Y\_] [\_Y\_]

1. About your child

Sex/Gender:  Male  Female  Prefer not to say

What is your child's estimated height (cm): \_\_\_\_\_  Not sure

What is your child's current estimated weight (kg): \_\_\_\_\_  Not sure

What was your child's estimated weight before Covid19 illness (kg): \_\_\_\_\_  Not sure

How many other members regularly live in your household, including yourself: [\_Number\_]

Does your child study in school/college/university?  Yes  No

How many years formal school education has your child had?\* [\_Number\_]

*\*including primary school (e.g. from around 6 years depending on country)*

Does your child study in kindergarten?  Yes  No

2. About your child's Covid-19 illness - all the questions relate to his/her health and wellbeing)

Approximately, what day did you first notice your child was experiencing symptoms of Covid-19? [\_D\_] [\_D\_] / [\_M\_] [\_M\_] / [\_2\_] [\_0\_] [\_Y\_] [\_Y\_]

How was your child diagnosed with Covid-19?

- Laboratory confirmed (positive PCR, antigen or Antibody test)  Physician confirmed  Test result is uncertain  
 Not sure

Estimated date of your child's most recent positive SARS-CoV-2 /Covid-19 test:

[\_D\_] [\_D\_] / [\_M\_] [\_M\_] / [\_2\_] [\_0\_] [\_2\_] [\_Y\_]

Indicate if  PCR test  Antibody test  Unknown

Has your child been admitted to hospital due to Covid-19?  Yes  No

*(If the answer is "no", please, move on to the section "3"; if the answer is "yes", please, proceed with the following questions)*

• Roughly at what date was your child first admitted to hospital?

[\_D\_] [\_D\_] / [\_M\_] [\_M\_] / [\_2\_] [\_0\_] [\_Y\_] [\_Y\_]

• Roughly at what date was your child first discharged from hospital?

[\_D\_] [\_D\_] / [\_M\_] [\_M\_] / [\_2\_] [\_0\_] [\_Y\_] [\_Y\_]

• If yes did they spent any time in the Paediatric Intensive Care Unit (PICU)?  Yes  No  Not sure

• Has your child been admitted to hospital after the first acute Covid-19 illness?  Yes  No

If yes, how many times: [\_Number\_]

Name of hospital/hospitals: \_\_\_\_\_

If yes, specify reason/reasons: \_\_\_\_\_

### 3. About your child's emotional wellbeing, social relationships and activities'

To answer the following questions, please **mark an X** on the lines below that shows your opinion on the question.

#### A. Compared to before your child's Covid-19 infection, how much is he/she now doing/experiencing the following

*If there are changes, please indicate whether you think these are due to the illness itself or to the Covid-19 pandemic*

##### Eating

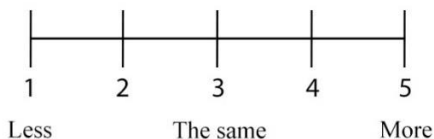

Not known

**If there are changes**, please indicate whether you think these are due to

Illness itself  Covid-19 pandemic  Both  Unsure

##### Sleeping

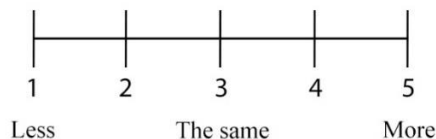

Not known

**If there are changes**, please indicate whether you think these are due to

Illness itself  Covid-19 pandemic  Both  Unsure

##### Physical Activity

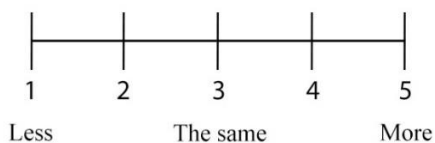

Not known

**If there are changes**, please indicate whether you think these are due to

Illness itself  Covid-19 pandemic  Both  Unsure

##### Fatigue

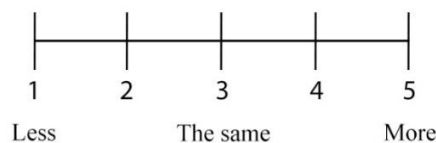

Not known

**If there are changes**, please indicate whether you think these are due to

Illness itself  Covid-19 pandemic  Both  Unsure

##### Spending time with friends in-person

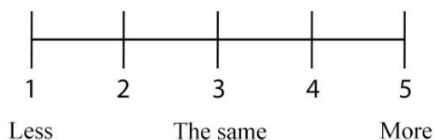

Not known

**If there are changes**, please indicate whether you think these are due to

Illness itself  Covid-19 pandemic  Both  Unsure

##### Spending time with friends remotely (e.g., online, social media, texting)

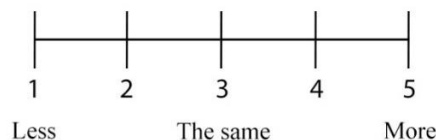

Not known

**If there are changes**, please indicate whether you think these are due to

Illness itself  Covid-19 pandemic  Both  Unsure

##### Spending time watching TV, playing video/computer games, or using social media for educational purposes, including school/nursery work



Not known

**If there are changes**, please indicate whether you think these are due to

Illness itself  Covid-19 pandemic  Both  Unsure

##### Spending time watching TV, playing video/computer games, or using social media for non-educational purposes,



Not known

**If there are changes**, please indicate whether you think these are due to

Illness itself  Covid-19 pandemic  Both  Unsure

##### Spending time outside

##### Attending school/nursery

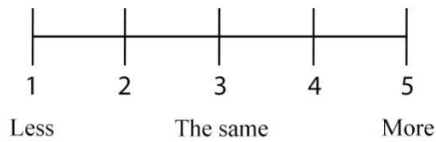

Not known

**If there are changes, please indicate whether you think these are due to**

Illness itself  Covid-19 pandemic  Both  Unsure

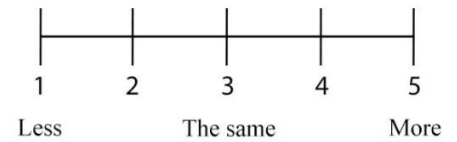

My child has not been attending school/nursery before Covid-19 infection

**If there are changes, please indicate whether you think these are due to**

Illness itself  Covid-19 pandemic  Both  Unsure

**B. Compared to before your child's Covid-19 illness: Have there been changes in your child's...**

**... CONNECTEDNESS with others...**

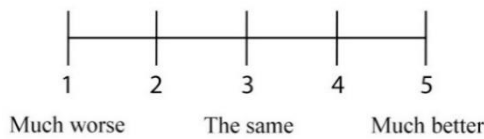

Unsure

**If there are changes, please indicate whether you think these are due to**

Illness itself  Covid-19 pandemic  Both  Unsure

**...EMOTIONS?**

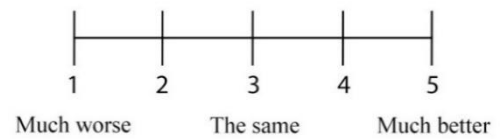

Unsure

**If there are changes, please indicate whether you think these are due to**

Illness itself  Covid-19 pandemic  Both  Unsure

**...BEHAVIOUR?**

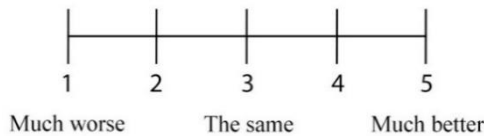

Unsure

**If there are changes, please indicate whether you think these are due to**

Illness itself  Covid-19 pandemic  Both  Unsure

**...RELATIONSHIPS, in how they get on with others?**

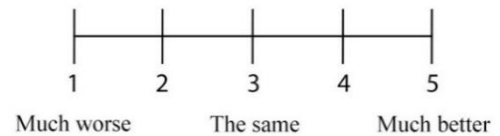

Unsure

**If there are changes, please indicate whether you think these are due to**

Illness itself  Covid-19 pandemic  Both  Unsure

**C. Have you asked for help from a health professional because of Covid-19 illness consequences to your child's EMOTIONS, BEHAVIOUR OR RELATIONSHIPS?**

Yes  No

If yes who did you ask for help from \_\_\_\_\_

**D. If you have replied MUCH WORSE to any of the options in question "B" OR YOU HAVE ASKED FOR HELP for these problems (question "C"), please, answer 3 of the following questions:**

**1. Do the difficulties upset or distress your child?**

Not at all  Only a little  Undecided  Quite a lot  A great deal

**2. Do the difficulties interfere with your child's everyday life in the following areas?**

|                    |                                                                                                                                                                                          |
|--------------------|------------------------------------------------------------------------------------------------------------------------------------------------------------------------------------------|
| Home Life          | <input type="checkbox"/> Not at all <input type="checkbox"/> Only a little <input type="checkbox"/> Undecided <input type="checkbox"/> Quite a lot <input type="checkbox"/> A great deal |
| Friendships        | <input type="checkbox"/> Not at all <input type="checkbox"/> Only a little <input type="checkbox"/> Undecided <input type="checkbox"/> Quite a lot <input type="checkbox"/> A great deal |
| Classroom Learning | <input type="checkbox"/> Not at all <input type="checkbox"/> Only a little <input type="checkbox"/> Undecided <input type="checkbox"/> Quite a lot <input type="checkbox"/> A great deal |
| Leisure Activities | <input type="checkbox"/> Not at all <input type="checkbox"/> Only a little <input type="checkbox"/> Undecided <input type="checkbox"/> Quite a lot <input type="checkbox"/> A great deal |

**3. Do these difficulties put a burden on you or the family as a whole?**

Not at all  Only a little  Undecided  Quite a lot  A great deal  Unsure

**E. Do you live in Moscow or Moscow Oblast?**  Yes  No

If No, what is the current situation in your town/city/region on lockdown measures?

**(you may select more than one answer)**

- Closing of child's school
- Closing of non-essential shops (shops and stores apart from food, doctors and drug stores)
- Closing of indoor places/venues
- Constraining meeting friends
- Closing of nurseries/kindergartens
- Cancellation/closing of recreational venues and activities
- Closing of outdoor recreational places
- Stay-at-home orders (not allowed to leave the house except for essential errands)

**4a. About your child's state of health prior to his/her Covid-19 illness**

**Has your child been physician's diagnosed or received treatment/support for any of the following chronic medical conditions prior to the Covid-19 infection? (answer with a tick in the box)**

|                                                                                                               | Yes | No | Unknown |
|---------------------------------------------------------------------------------------------------------------|-----|----|---------|
| Prematurity ( <i>baby born &lt;37 weeks</i> )                                                                 |     |    |         |
| Neurological                                                                                                  |     |    |         |
| Neurodisability                                                                                               |     |    |         |
| Heart diseases                                                                                                |     |    |         |
| Respiratory diseases (not including asthma)                                                                   |     |    |         |
| Tuberculosis                                                                                                  |     |    |         |
| Asthma (doctor's diagnosed)                                                                                   |     |    |         |
| Allergic rhinitis/hay fever                                                                                   |     |    |         |
| Food allergy                                                                                                  |     |    |         |
| Atopic dermatitis/Eczema                                                                                      |     |    |         |
| Other skin problems (not including eczema)                                                                    |     |    |         |
| Gut problems                                                                                                  |     |    |         |
| Haematology ( <i>blood diseases</i> )                                                                         |     |    |         |
| Oncology ( <i>cancer or other progressively enlarging or spreading tumor</i> )                                |     |    |         |
| Immune system diseases ( <i>e.g. primary immune deficiencies</i> )                                            |     |    |         |
| Genetic conditions                                                                                            |     |    |         |
| Diabetes (if yes indicate type: <input type="checkbox"/> Type 1 <input type="checkbox"/> Type 2)              |     |    |         |
| Other endocrine illness (not diabetes)                                                                        |     |    |         |
| Renal/Kidney problems                                                                                         |     |    |         |
| Excessive weight and obesity                                                                                  |     |    |         |
| Malnutrition ( <i>deficiencies, excesses, or imbalances in a person's intake of energy and/or nutrients</i> ) |     |    |         |
| Rheumatology ( <i>e.g. arthritis, or inflammation of the joints</i> )                                         |     |    |         |
| Depression                                                                                                    |     |    |         |
| Anxiety                                                                                                       |     |    |         |
| HIV                                                                                                           |     |    |         |
| Other (please indicate)                                                                                       |     |    |         |

**Has your child ever been under Child and Adolescent Mental Health services before the Covid-19 pandemic?**  Yes  No  Not sure

**Prior to Covid-19 infection, how was your child's physical health in general?**

- Very poor  Poor  Ok  Good  Very good

**If you ticked poor or very poor, please explain:**

**Prior to Covid-19 infection, how would you describe your child's mental health in general**

- Very poor  Poor  Ok  Good  Very good

**If you ticked poor or very poor, please explain:**

**Have you requested help because of Covid-19 consequences to your child's physical health?**

Yes  No  Not sure

**4b. About your child's current health**

**Has your child felt feverish recently?**  Yes  No  Not sure

**If yes indicate when they felt feverish (tick all that apply)**

- Within the last 7 days  >1-2 weeks  >2-4 weeks  >1-2 months  >2-3 months  >3-6 months  
 >6 months ago

**If yes, what was the most likely cause of your child's most recent feverish illness?**

- Covid-19  Other respiratory infection (cough/cold/sore throat)  TB  Stomach infection (diarrhea/vomiting)  Urinary infection  Other (specify): \_\_\_\_\_  
 Unknown  Prefer not to say

**If Covid-19, what was the estimated date of the most recent positive SARS-CoV-2 /Covid-19 test?**

[\_D\_] [\_D\_] / [\_M\_] [\_M\_] / [\_2\_] [\_0\_] [\_2\_] [\_Y\_] ]

Indicate if  PCR test  Antibody test  Unknown

**How much do you agree with the following statement?**

**"My child has fully recovered from Covid-19"**

Please **mark an X** on the line below that shows your opinion on the question as of **TODAY**

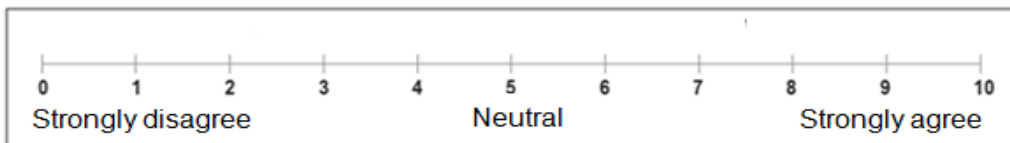

**5. Since having Covid-19, has your child been diagnosed with any of the following? (indicate the correct answer in the box provided)**

|                                                      | YES | NO |                                                  | YES | NO |
|------------------------------------------------------|-----|----|--------------------------------------------------|-----|----|
| Multisystem inflammatory syndrome                    |     |    | Shock / Toxic shock syndrome                     |     |    |
| Pulmonary embolism<br>(PE, "Clot in lung")           |     |    | Coagulopathy<br>(excessive bleeding or clotting) |     |    |
| Kawasaki disease                                     |     |    | Kidney problems                                  |     |    |
| Multisystem inflammatory syndrome<br>(MIS-C/PIMS-TS) |     |    | Type 1 Diabetes                                  |     |    |
| Respiratory failure                                  |     |    | Type 2 Diabetes                                  |     |    |
| Asthma                                               |     |    | Intussusception                                  |     |    |
| Myocarditis<br>(inflammation of the heart muscle)    |     |    | Other condition (if yes specify):                |     |    |

**6a. Within the last seven days, has your child had any of these symptoms, which were NOT present prior to their Covid-19 illness?  
If yes, please indicate below and the duration of the symptom/s:**

| <b>Respiratory problems</b>                                                            | <b>Tick Yes or No</b>                                    | <b>If yes, what is the duration of symptoms</b>                                                                                                                                                                                                                                                                                                                                                                                                                                                                                                                                                      |
|----------------------------------------------------------------------------------------|----------------------------------------------------------|------------------------------------------------------------------------------------------------------------------------------------------------------------------------------------------------------------------------------------------------------------------------------------------------------------------------------------------------------------------------------------------------------------------------------------------------------------------------------------------------------------------------------------------------------------------------------------------------------|
| Nasal congestion / rhinorrhea                                                          | <input type="checkbox"/> Yes <input type="checkbox"/> No | <input type="checkbox"/> < 1 month <input type="checkbox"/> 1-2 months <input type="checkbox"/> >2 -3 months <input type="checkbox"/> >3-4 months <input type="checkbox"/> >4-5 months<br><input type="checkbox"/> >5-6 months <input type="checkbox"/> >6-7 months <input type="checkbox"/> >7 -8 months <input type="checkbox"/> >8-9 months <input type="checkbox"/> >9 -10 months<br><input type="checkbox"/> >10-11 months <input type="checkbox"/> >11 -12 months <input type="checkbox"/> >12 months <input type="checkbox"/> From the time of discharge<br><input type="checkbox"/> Not sure |
| Difficulty breathing /chest tightness                                                  | <input type="checkbox"/> Yes <input type="checkbox"/> No | <input type="checkbox"/> < 1 month <input type="checkbox"/> 1-2 months <input type="checkbox"/> >2 -3 months <input type="checkbox"/> >3-4 months <input type="checkbox"/> >4-5 months<br><input type="checkbox"/> >5-6 months <input type="checkbox"/> >6-7 months <input type="checkbox"/> >7 -8 months <input type="checkbox"/> >8-9 months <input type="checkbox"/> >9 -10 months<br><input type="checkbox"/> >10-11 months <input type="checkbox"/> >11 -12 months <input type="checkbox"/> >12 months <input type="checkbox"/> From the time of discharge<br><input type="checkbox"/> Not sure |
| Pain on breathing                                                                      | <input type="checkbox"/> Yes <input type="checkbox"/> No | <input type="checkbox"/> < 1 month <input type="checkbox"/> 1-2 months <input type="checkbox"/> >2 -3 months <input type="checkbox"/> >3-4 months <input type="checkbox"/> >4-5 months<br><input type="checkbox"/> >5-6 months <input type="checkbox"/> >6-7 months <input type="checkbox"/> >7 -8 months <input type="checkbox"/> >8-9 months <input type="checkbox"/> >9 -10 months<br><input type="checkbox"/> >10-11 months <input type="checkbox"/> >11 -12 months <input type="checkbox"/> >12 months <input type="checkbox"/> From the time of discharge<br><input type="checkbox"/> Not sure |
| Chest pain                                                                             | <input type="checkbox"/> Yes <input type="checkbox"/> No | <input type="checkbox"/> < 1 month <input type="checkbox"/> 1-2 months <input type="checkbox"/> >2 -3 months <input type="checkbox"/> >3-4 months <input type="checkbox"/> >4-5 months<br><input type="checkbox"/> >5-6 months <input type="checkbox"/> >6-7 months <input type="checkbox"/> >7 -8 months <input type="checkbox"/> >8-9 months <input type="checkbox"/> >9 -10 months<br><input type="checkbox"/> >10-11 months <input type="checkbox"/> >11 -12 months <input type="checkbox"/> >12 months <input type="checkbox"/> From the time of discharge<br><input type="checkbox"/> Not sure |
| Persistent cough                                                                       | <input type="checkbox"/> Yes <input type="checkbox"/> No | <input type="checkbox"/> < 1 month <input type="checkbox"/> 1-2 months <input type="checkbox"/> >2 -3 months <input type="checkbox"/> >3-4 months <input type="checkbox"/> >4-5 months<br><input type="checkbox"/> >5-6 months <input type="checkbox"/> >6-7 months <input type="checkbox"/> >7 -8 months <input type="checkbox"/> >8-9 months <input type="checkbox"/> >9 -10 months<br><input type="checkbox"/> >10-11 months <input type="checkbox"/> >11 -12 months <input type="checkbox"/> >12 months <input type="checkbox"/> From the time of discharge<br><input type="checkbox"/> Not sure |
| <i>If yes, <input type="checkbox"/> dry cough <input type="checkbox"/> with phlegm</i> |                                                          |                                                                                                                                                                                                                                                                                                                                                                                                                                                                                                                                                                                                      |
| <b>Musculoskeletal problems</b>                                                        | <b>Tick Yes or No</b>                                    | <b>If yes, what is the duration of symptoms</b>                                                                                                                                                                                                                                                                                                                                                                                                                                                                                                                                                      |
| Cannot fully move or control movement                                                  | <input type="checkbox"/> Yes <input type="checkbox"/> No | <input type="checkbox"/> < 1 month <input type="checkbox"/> 1-2 months <input type="checkbox"/> >2 -3 months <input type="checkbox"/> >3-4 months <input type="checkbox"/> >4-5 months<br><input type="checkbox"/> >5-6 months <input type="checkbox"/> >6-7 months <input type="checkbox"/> >7 -8 months <input type="checkbox"/> >8-9 months <input type="checkbox"/> >9 -10 months<br><input type="checkbox"/> >10-11 months <input type="checkbox"/> >11 -12 months <input type="checkbox"/> >12 months <input type="checkbox"/> From the time of discharge<br><input type="checkbox"/> Not sure |
| Problems with balance                                                                  | <input type="checkbox"/> Yes <input type="checkbox"/> No | <input type="checkbox"/> < 1 month <input type="checkbox"/> 1-2 months <input type="checkbox"/> >2 -3 months <input type="checkbox"/> >3-4 months <input type="checkbox"/> >4-5 months<br><input type="checkbox"/> >5-6 months <input type="checkbox"/> >6-7 months <input type="checkbox"/> >7 -8 months <input type="checkbox"/> >8-9 months <input type="checkbox"/> >9 -10 months<br><input type="checkbox"/> >10-11 months <input type="checkbox"/> >11 -12 months <input type="checkbox"/> >12 months <input type="checkbox"/> From the time of discharge<br><input type="checkbox"/> Not sure |
| Persistent muscle pain                                                                 | <input type="checkbox"/> Yes <input type="checkbox"/> No | <input type="checkbox"/> < 1 month <input type="checkbox"/> 1-2 months <input type="checkbox"/> >2 -3 months <input type="checkbox"/> >3-4 months <input type="checkbox"/> >4-5 months<br><input type="checkbox"/> >5-6 months <input type="checkbox"/> >6-7 months <input type="checkbox"/> >7 -8 months <input type="checkbox"/> >8-9 months <input type="checkbox"/> >9 -10 months<br><input type="checkbox"/> >10-11 months <input type="checkbox"/> >11 -12 months <input type="checkbox"/> >12 months <input type="checkbox"/> From the time of discharge                                      |

|                                |                                                          |                                                                                                                                                                                                                                                                                                                                                                                                                                                                                                                                                                                                      |
|--------------------------------|----------------------------------------------------------|------------------------------------------------------------------------------------------------------------------------------------------------------------------------------------------------------------------------------------------------------------------------------------------------------------------------------------------------------------------------------------------------------------------------------------------------------------------------------------------------------------------------------------------------------------------------------------------------------|
|                                |                                                          | <input type="checkbox"/> Not sure                                                                                                                                                                                                                                                                                                                                                                                                                                                                                                                                                                    |
| Joint pain or swelling         | <input type="checkbox"/> Yes <input type="checkbox"/> No | <input type="checkbox"/> < 1 month <input type="checkbox"/> 1-2 months <input type="checkbox"/> >2 -3 months <input type="checkbox"/> >3-4 months <input type="checkbox"/> >4-5 months<br><input type="checkbox"/> >5-6 months <input type="checkbox"/> >6-7 months <input type="checkbox"/> >7 -8 months <input type="checkbox"/> >8-9 months <input type="checkbox"/> >9 -10 months<br><input type="checkbox"/> >10-11 months <input type="checkbox"/> >11 -12 months <input type="checkbox"/> >12 months <input type="checkbox"/> From the time of discharge<br><input type="checkbox"/> Not sure |
| <b>Neurological problems</b>   | <b>Tick Yes or No</b>                                    | <b>If yes, what is the duration of symptoms</b>                                                                                                                                                                                                                                                                                                                                                                                                                                                                                                                                                      |
| Headache                       | <input type="checkbox"/> Yes <input type="checkbox"/> No | <input type="checkbox"/> < 1 month <input type="checkbox"/> 1-2 months <input type="checkbox"/> >2 -3 months <input type="checkbox"/> >3-4 months <input type="checkbox"/> >4-5 months<br><input type="checkbox"/> >5-6 months <input type="checkbox"/> >6-7 months <input type="checkbox"/> >7 -8 months <input type="checkbox"/> >8-9 months <input type="checkbox"/> >9 -10 months<br><input type="checkbox"/> >10-11 months <input type="checkbox"/> >11 -12 months <input type="checkbox"/> >12 months <input type="checkbox"/> From the time of discharge<br><input type="checkbox"/> Not sure |
| Dizziness/ light headedness    | <input type="checkbox"/> Yes <input type="checkbox"/> No | <input type="checkbox"/> < 1 month <input type="checkbox"/> 1-2 months <input type="checkbox"/> >2 -3 months <input type="checkbox"/> >3-4 months <input type="checkbox"/> >4-5 months<br><input type="checkbox"/> >5-6 months <input type="checkbox"/> >6-7 months <input type="checkbox"/> >7 -8 months <input type="checkbox"/> >8-9 months <input type="checkbox"/> >9 -10 months<br><input type="checkbox"/> >10-11 months <input type="checkbox"/> >11 -12 months <input type="checkbox"/> >12 months <input type="checkbox"/> From the time of discharge<br><input type="checkbox"/> Not sure |
| Fainting/ blackouts            | <input type="checkbox"/> Yes <input type="checkbox"/> No | <input type="checkbox"/> < 1 month <input type="checkbox"/> 1-2 months <input type="checkbox"/> >2 -3 months <input type="checkbox"/> >3-4 months <input type="checkbox"/> >4-5 months<br><input type="checkbox"/> >5-6 months <input type="checkbox"/> >6-7 months <input type="checkbox"/> >7 -8 months <input type="checkbox"/> >8-9 months <input type="checkbox"/> >9 -10 months<br><input type="checkbox"/> >10-11 months <input type="checkbox"/> >11 -12 months <input type="checkbox"/> >12 months <input type="checkbox"/> From the time of discharge<br><input type="checkbox"/> Not sure |
| Problems seeing/blurred vision | <input type="checkbox"/> Yes <input type="checkbox"/> No | <input type="checkbox"/> < 1 month <input type="checkbox"/> 1-2 months <input type="checkbox"/> >2 -3 months <input type="checkbox"/> >3-4 months <input type="checkbox"/> >4-5 months<br><input type="checkbox"/> >5-6 months <input type="checkbox"/> >6-7 months <input type="checkbox"/> >7 -8 months <input type="checkbox"/> >8-9 months <input type="checkbox"/> >9 -10 months<br><input type="checkbox"/> >10-11 months <input type="checkbox"/> >11 -12 months <input type="checkbox"/> >12 months <input type="checkbox"/> From the time of discharge<br><input type="checkbox"/> Not sure |
| Disturbed smell                | <input type="checkbox"/> Yes <input type="checkbox"/> No | <input type="checkbox"/> < 1 month <input type="checkbox"/> 1-2 months <input type="checkbox"/> >2 -3 months <input type="checkbox"/> >3-4 months <input type="checkbox"/> >4-5 months<br><input type="checkbox"/> >5-6 months <input type="checkbox"/> >6-7 months <input type="checkbox"/> >7 -8 months <input type="checkbox"/> >8-9 months <input type="checkbox"/> >9 -10 months<br><input type="checkbox"/> >10-11 months <input type="checkbox"/> >11 -12 months <input type="checkbox"/> >12 months <input type="checkbox"/> From the time of discharge<br><input type="checkbox"/> Not sure |
| Loss of smell                  | <input type="checkbox"/> Yes <input type="checkbox"/> No | <input type="checkbox"/> < 1 month <input type="checkbox"/> 1-2 months <input type="checkbox"/> >2 -3 months <input type="checkbox"/> >3-4 months <input type="checkbox"/> >4-5 months<br><input type="checkbox"/> >5-6 months <input type="checkbox"/> >6-7 months <input type="checkbox"/> >7 -8 months <input type="checkbox"/> >8-9 months <input type="checkbox"/> >9 -10 months<br><input type="checkbox"/> >10-11 months <input type="checkbox"/> >11 -12 months <input type="checkbox"/> >12 months <input type="checkbox"/> From the time of discharge<br><input type="checkbox"/> Not sure |
| Disturbed taste                | <input type="checkbox"/> Yes <input type="checkbox"/> No | <input type="checkbox"/> < 1 month <input type="checkbox"/> 1-2 months <input type="checkbox"/> >2 -3 months <input type="checkbox"/> >3-4 months <input type="checkbox"/> >4-5 months<br><input type="checkbox"/> >5-6 months <input type="checkbox"/> >6-7 months <input type="checkbox"/> >7 -8 months <input type="checkbox"/> >8-9 months <input type="checkbox"/> >9 -10 months<br><input type="checkbox"/> >10-11 months <input type="checkbox"/> >11 -12 months <input type="checkbox"/> >12 months <input type="checkbox"/> From the time of discharge<br><input type="checkbox"/> Not sure |
| Loss of taste                  | <input type="checkbox"/> Yes <input type="checkbox"/> No | <input type="checkbox"/> < 1 month <input type="checkbox"/> 1-2 months <input type="checkbox"/> >2 -3 months <input type="checkbox"/> >3-4 months <input type="checkbox"/> >4-5 months<br><input type="checkbox"/> >5-6 months <input type="checkbox"/> >6-7 months <input type="checkbox"/> >7 -8 months <input type="checkbox"/> >8-9 months <input type="checkbox"/> >9 -10 months<br><input type="checkbox"/> >10-11 months <input type="checkbox"/> >11 -12 months <input type="checkbox"/> >12 months <input type="checkbox"/> From the time of discharge<br><input type="checkbox"/> Not sure |
| Tremor/shakiness               | <input type="checkbox"/> Yes <input type="checkbox"/> No | <input type="checkbox"/> < 1 month <input type="checkbox"/> 1-2 months <input type="checkbox"/> >2 -3 months <input type="checkbox"/> >3-4 months <input type="checkbox"/> >4-5 months<br><input type="checkbox"/> >5-6 months <input type="checkbox"/> >6-7 months <input type="checkbox"/> >7 -8 months <input type="checkbox"/> >8-9 months <input type="checkbox"/> >9 -10 months<br><input type="checkbox"/> >10-11 months <input type="checkbox"/> >11 -12 months <input type="checkbox"/> >12 months <input type="checkbox"/> From the time of discharge<br><input type="checkbox"/> Not sure |



|                                                                                  |                                                          |                                                                                                                                                                                                                                                                                                                                                                                                                                                                                                                                                                                                      |
|----------------------------------------------------------------------------------|----------------------------------------------------------|------------------------------------------------------------------------------------------------------------------------------------------------------------------------------------------------------------------------------------------------------------------------------------------------------------------------------------------------------------------------------------------------------------------------------------------------------------------------------------------------------------------------------------------------------------------------------------------------------|
| Tingling feeling/ "pins and needles"                                             | <input type="checkbox"/> Yes <input type="checkbox"/> No | <input type="checkbox"/> < 1 month <input type="checkbox"/> 1-2 months <input type="checkbox"/> >2 -3 months <input type="checkbox"/> >3-4 months <input type="checkbox"/> >4-5 months<br><input type="checkbox"/> >5-6 months <input type="checkbox"/> >6-7 months <input type="checkbox"/> >7 -8 months <input type="checkbox"/> >8-9 months <input type="checkbox"/> >9 -10 months<br><input type="checkbox"/> >10-11 months <input type="checkbox"/> >11 -12 months <input type="checkbox"/> >12 months <input type="checkbox"/> From the time of discharge<br><input type="checkbox"/> Not sure |
| Seizures/fits                                                                    | <input type="checkbox"/> Yes <input type="checkbox"/> No | <input type="checkbox"/> < 1 month <input type="checkbox"/> 1-2 months <input type="checkbox"/> >2 -3 months <input type="checkbox"/> >3-4 months <input type="checkbox"/> >4-5 months<br><input type="checkbox"/> >5-6 months <input type="checkbox"/> >6-7 months <input type="checkbox"/> >7 -8 months <input type="checkbox"/> >8-9 months <input type="checkbox"/> >9 -10 months<br><input type="checkbox"/> >10-11 months <input type="checkbox"/> >11 -12 months <input type="checkbox"/> >12 months <input type="checkbox"/> From the time of discharge<br><input type="checkbox"/> Not sure |
| Confusion/lack of concentration                                                  | <input type="checkbox"/> Yes <input type="checkbox"/> No | <input type="checkbox"/> < 1 month <input type="checkbox"/> 1-2 months <input type="checkbox"/> >2 -3 months <input type="checkbox"/> >3-4 months <input type="checkbox"/> >4-5 months<br><input type="checkbox"/> >5-6 months <input type="checkbox"/> >6-7 months <input type="checkbox"/> >7 -8 months <input type="checkbox"/> >8-9 months <input type="checkbox"/> >9 -10 months<br><input type="checkbox"/> >10-11 months <input type="checkbox"/> >11 -12 months <input type="checkbox"/> >12 months <input type="checkbox"/> From the time of discharge<br><input type="checkbox"/> Not sure |
| Problems speaking or communicating                                               | <input type="checkbox"/> Yes <input type="checkbox"/> No | <input type="checkbox"/> < 1 month <input type="checkbox"/> 1-2 months <input type="checkbox"/> >2 -3 months <input type="checkbox"/> >3-4 months <input type="checkbox"/> >4-5 months<br><input type="checkbox"/> >5-6 months <input type="checkbox"/> >6-7 months <input type="checkbox"/> >7 -8 months <input type="checkbox"/> >8-9 months <input type="checkbox"/> >9 -10 months<br><input type="checkbox"/> >10-11 months <input type="checkbox"/> >11 -12 months <input type="checkbox"/> >12 months <input type="checkbox"/> From the time of discharge<br><input type="checkbox"/> Not sure |
| Insomnia ( <i>hard to fall asleep, hard to stay asleep</i> )                     | <input type="checkbox"/> Yes <input type="checkbox"/> No | <input type="checkbox"/> < 1 month <input type="checkbox"/> 1-2 months <input type="checkbox"/> >2 -3 months <input type="checkbox"/> >3-4 months <input type="checkbox"/> >4-5 months<br><input type="checkbox"/> >5-6 months <input type="checkbox"/> >6-7 months <input type="checkbox"/> >7 -8 months <input type="checkbox"/> >8-9 months <input type="checkbox"/> >9 -10 months<br><input type="checkbox"/> >10-11 months <input type="checkbox"/> >11 -12 months <input type="checkbox"/> >12 months <input type="checkbox"/> From the time of discharge<br><input type="checkbox"/> Not sure |
| Hypersomnia ( <i>excessive daytime sleepiness or prolonged nighttime sleep</i> ) | <input type="checkbox"/> Yes <input type="checkbox"/> No | <input type="checkbox"/> < 1 month <input type="checkbox"/> 1-2 months <input type="checkbox"/> >2 -3 months <input type="checkbox"/> >3-4 months <input type="checkbox"/> >4-5 months<br><input type="checkbox"/> >5-6 months <input type="checkbox"/> >6-7 months <input type="checkbox"/> >7 -8 months <input type="checkbox"/> >8-9 months <input type="checkbox"/> >9 -10 months<br><input type="checkbox"/> >10-11 months <input type="checkbox"/> >11 -12 months <input type="checkbox"/> >12 months <input type="checkbox"/> From the time of discharge<br><input type="checkbox"/> Not sure |
| <b>Fatigue</b>                                                                   | <input type="checkbox"/> Yes <input type="checkbox"/> No | <input type="checkbox"/> < 1 month <input type="checkbox"/> 1-2 months <input type="checkbox"/> >2 -3 months <input type="checkbox"/> >3-4 months <input type="checkbox"/> >4-5 months<br><input type="checkbox"/> >5-6 months <input type="checkbox"/> >6-7 months <input type="checkbox"/> >7 -8 months <input type="checkbox"/> >8-9 months <input type="checkbox"/> >9 -10 months<br><input type="checkbox"/> >10-11 months <input type="checkbox"/> >11 -12 months <input type="checkbox"/> >12 months <input type="checkbox"/> From the time of discharge<br><input type="checkbox"/> Not sure |
| <b>Gastrointestinal problems</b>                                                 | <b>Tick Yes or No</b>                                    | <b>If yes, what is the duration of symptoms</b>                                                                                                                                                                                                                                                                                                                                                                                                                                                                                                                                                      |
| Weight loss                                                                      | <input type="checkbox"/> Yes <input type="checkbox"/> No | <input type="checkbox"/> < 1 month <input type="checkbox"/> 1-2 months <input type="checkbox"/> >2 -3 months <input type="checkbox"/> >3-4 months <input type="checkbox"/> >4-5 months<br><input type="checkbox"/> >5-6 months <input type="checkbox"/> >6-7 months <input type="checkbox"/> >7 -8 months <input type="checkbox"/> >8-9 months <input type="checkbox"/> >9 -10 months<br><input type="checkbox"/> >10-11 months <input type="checkbox"/> >11 -12 months <input type="checkbox"/> >12 months <input type="checkbox"/> From the time of discharge<br><input type="checkbox"/> Not sure |
| Problems swallowing or chewing                                                   | <input type="checkbox"/> Yes <input type="checkbox"/> No | <input type="checkbox"/> < 1 month <input type="checkbox"/> 1-2 months <input type="checkbox"/> >2 -3 months <input type="checkbox"/> >3-4 months <input type="checkbox"/> >4-5 months<br><input type="checkbox"/> >5-6 months <input type="checkbox"/> >6-7 months <input type="checkbox"/> >7 -8 months <input type="checkbox"/> >8-9 months <input type="checkbox"/> >9 -10 months<br><input type="checkbox"/> >10-11 months <input type="checkbox"/> >11 -12 months <input type="checkbox"/> >12 months <input type="checkbox"/> From the time of discharge<br><input type="checkbox"/> Not sure |
| Poor appetite                                                                    | <input type="checkbox"/> Yes <input type="checkbox"/> No | <input type="checkbox"/> < 1 month <input type="checkbox"/> 1-2 months <input type="checkbox"/> >2 -3 months <input type="checkbox"/> >3-4 months <input type="checkbox"/> >4-5 months<br><input type="checkbox"/> >5-6 months <input type="checkbox"/> >6-7 months <input type="checkbox"/> >7 -8 months <input type="checkbox"/> >8-9 months <input type="checkbox"/> >9 -10 months<br><input type="checkbox"/> >10-11 months <input type="checkbox"/> >11 -12 months <input type="checkbox"/> >12 months <input type="checkbox"/> From the time of discharge<br><input type="checkbox"/> Not sure |
| Diarrhea                                                                         | <input type="checkbox"/> Yes <input type="checkbox"/> No | <input type="checkbox"/> < 1 month <input type="checkbox"/> 1-2 months <input type="checkbox"/> >2 -3 months <input type="checkbox"/> >3-4 months <input type="checkbox"/> >4-5 months                                                                                                                                                                                                                                                                                                                                                                                                               |

|                                                               |                                                                                                     |                                                                                                                                                                                                                                                                                                                                                                                                                                                                                                                                                                                                      |
|---------------------------------------------------------------|-----------------------------------------------------------------------------------------------------|------------------------------------------------------------------------------------------------------------------------------------------------------------------------------------------------------------------------------------------------------------------------------------------------------------------------------------------------------------------------------------------------------------------------------------------------------------------------------------------------------------------------------------------------------------------------------------------------------|
|                                                               |                                                                                                     | <input type="checkbox"/> >5-6 months <input type="checkbox"/> >6-7 months <input type="checkbox"/> >7 -8 months <input type="checkbox"/> >8-9 months <input type="checkbox"/> >9 -10 months<br><input type="checkbox"/> >10-11 months <input type="checkbox"/> >11 -12 months <input type="checkbox"/> >12 months <input type="checkbox"/> From the time of discharge<br><input type="checkbox"/> Not sure                                                                                                                                                                                           |
| Stomach/ abdominal pain                                       | <input type="checkbox"/> Yes <input type="checkbox"/> No                                            | <input type="checkbox"/> < 1 month <input type="checkbox"/> 1-2 months <input type="checkbox"/> >2 -3 months <input type="checkbox"/> >3-4 months <input type="checkbox"/> >4-5 months<br><input type="checkbox"/> >5-6 months <input type="checkbox"/> >6-7 months <input type="checkbox"/> >7 -8 months <input type="checkbox"/> >8-9 months <input type="checkbox"/> >9 -10 months<br><input type="checkbox"/> >10-11 months <input type="checkbox"/> >11 -12 months <input type="checkbox"/> >12 months <input type="checkbox"/> From the time of discharge<br><input type="checkbox"/> Not sure |
| Feeling nauseous                                              | <input type="checkbox"/> Yes <input type="checkbox"/> No                                            | <input type="checkbox"/> < 1 month <input type="checkbox"/> 1-2 months <input type="checkbox"/> >2 -3 months <input type="checkbox"/> >3-4 months <input type="checkbox"/> >4-5 months<br><input type="checkbox"/> >5-6 months <input type="checkbox"/> >6-7 months <input type="checkbox"/> >7 -8 months <input type="checkbox"/> >8-9 months <input type="checkbox"/> >9 -10 months<br><input type="checkbox"/> >10-11 months <input type="checkbox"/> >11 -12 months <input type="checkbox"/> >12 months <input type="checkbox"/> From the time of discharge<br><input type="checkbox"/> Not sure |
| Vomiting                                                      | <input type="checkbox"/> Yes <input type="checkbox"/> No                                            | <input type="checkbox"/> < 1 month <input type="checkbox"/> 1-2 months <input type="checkbox"/> >2 -3 months <input type="checkbox"/> >3-4 months <input type="checkbox"/> >4-5 months<br><input type="checkbox"/> >5-6 months <input type="checkbox"/> >6-7 months <input type="checkbox"/> >7 -8 months <input type="checkbox"/> >8-9 months <input type="checkbox"/> >9 -10 months<br><input type="checkbox"/> >10-11 months <input type="checkbox"/> >11 -12 months <input type="checkbox"/> >12 months <input type="checkbox"/> From the time of discharge<br><input type="checkbox"/> Not sure |
| Constipation                                                  | <input type="checkbox"/> Yes <input type="checkbox"/> No                                            | <input type="checkbox"/> < 1 month <input type="checkbox"/> 1-2 months <input type="checkbox"/> >2 -3 months <input type="checkbox"/> >3-4 months <input type="checkbox"/> >4-5 months<br><input type="checkbox"/> >5-6 months <input type="checkbox"/> >6-7 months <input type="checkbox"/> >7 -8 months <input type="checkbox"/> >8-9 months <input type="checkbox"/> >9 -10 months<br><input type="checkbox"/> >10-11 months <input type="checkbox"/> >11 -12 months <input type="checkbox"/> >12 months <input type="checkbox"/> From the time of discharge<br><input type="checkbox"/> Not sure |
| <b>Cardiovascular problems</b>                                | <b>Tick Yes or No</b>                                                                               | <b><u>If yes</u>, what is the duration of symptoms</b>                                                                                                                                                                                                                                                                                                                                                                                                                                                                                                                                               |
| Palpitations (heart racing)                                   | <input type="checkbox"/> Yes <input type="checkbox"/> No                                            | <input type="checkbox"/> < 1 month <input type="checkbox"/> 1-2 months <input type="checkbox"/> >2 -3 months <input type="checkbox"/> >3-4 months <input type="checkbox"/> >4-5 months<br><input type="checkbox"/> >5-6 months <input type="checkbox"/> >6-7 months <input type="checkbox"/> >7 -8 months <input type="checkbox"/> >8-9 months <input type="checkbox"/> >9 -10 months<br><input type="checkbox"/> >10-11 months <input type="checkbox"/> >11 -12 months <input type="checkbox"/> >12 months <input type="checkbox"/> From the time of discharge<br><input type="checkbox"/> Not sure |
| Variations in heart rate (tachycardia or bradycardia)         | <input type="checkbox"/> Yes <input type="checkbox"/> No                                            | <input type="checkbox"/> < 1 month <input type="checkbox"/> 1-2 months <input type="checkbox"/> >2 -3 months <input type="checkbox"/> >3-4 months <input type="checkbox"/> >4-5 months<br><input type="checkbox"/> >5-6 months <input type="checkbox"/> >6-7 months <input type="checkbox"/> >7 -8 months <input type="checkbox"/> >8-9 months <input type="checkbox"/> >9 -10 months<br><input type="checkbox"/> >10-11 months <input type="checkbox"/> >11 -12 months <input type="checkbox"/> >12 months <input type="checkbox"/> From the time of discharge<br><input type="checkbox"/> Not sure |
| Bleeding                                                      | <input type="checkbox"/> Yes <input type="checkbox"/> No                                            | <input type="checkbox"/> < 1 month <input type="checkbox"/> 1-2 months <input type="checkbox"/> >2 -3 months <input type="checkbox"/> >3-4 months <input type="checkbox"/> >4-5 months<br><input type="checkbox"/> >5-6 months <input type="checkbox"/> >6-7 months <input type="checkbox"/> >7 -8 months <input type="checkbox"/> >8-9 months <input type="checkbox"/> >9 -10 months<br><input type="checkbox"/> >10-11 months <input type="checkbox"/> >11 -12 months <input type="checkbox"/> >12 months <input type="checkbox"/> From the time of discharge<br><input type="checkbox"/> Not sure |
| <i>If yes, specify bleeding site:</i>                         |                                                                                                     |                                                                                                                                                                                                                                                                                                                                                                                                                                                                                                                                                                                                      |
| <b>Genitourinary problems</b>                                 | <b>Tick Yes or No</b>                                                                               | <b><u>If yes</u>, what is the duration of symptoms</b>                                                                                                                                                                                                                                                                                                                                                                                                                                                                                                                                               |
| Urination problems                                            | <input type="checkbox"/> Yes <input type="checkbox"/> No                                            | <input type="checkbox"/> < 1 month <input type="checkbox"/> 1-2 months <input type="checkbox"/> >2 -3 months <input type="checkbox"/> >3-4 months <input type="checkbox"/> >4-5 months<br><input type="checkbox"/> >5-6 months <input type="checkbox"/> >6-7 months <input type="checkbox"/> >7 -8 months <input type="checkbox"/> >8-9 months <input type="checkbox"/> >9 -10 months<br><input type="checkbox"/> >10-11 months <input type="checkbox"/> >11 -12 months <input type="checkbox"/> >12 months <input type="checkbox"/> From the time of discharge<br><input type="checkbox"/> Not sure |
| Changes in menstruation, (if regular before Covid-19 illness) | <input type="checkbox"/> Yes <input type="checkbox"/> No<br><input type="checkbox"/> Not applicable | <input type="checkbox"/> < 1 month <input type="checkbox"/> 1-2 months <input type="checkbox"/> >2 -3 months <input type="checkbox"/> >3-4 months <input type="checkbox"/> >4-5 months<br><input type="checkbox"/> >5-6 months <input type="checkbox"/> >6-7 months <input type="checkbox"/> >7 -8 months <input type="checkbox"/> >8-9 months <input type="checkbox"/> >9 -10 months<br><input type="checkbox"/> >10-11 months <input type="checkbox"/> >11 -12 months <input type="checkbox"/> >12 months <input type="checkbox"/> From the time of discharge<br><input type="checkbox"/> Not sure |

| Other problems                                                                                                     | Tick Yes or No                                           | If yes, what is the duration of symptoms                                                                                                                                                                                                                                                                                                                                                                                                                                                                                                                                                             |
|--------------------------------------------------------------------------------------------------------------------|----------------------------------------------------------|------------------------------------------------------------------------------------------------------------------------------------------------------------------------------------------------------------------------------------------------------------------------------------------------------------------------------------------------------------------------------------------------------------------------------------------------------------------------------------------------------------------------------------------------------------------------------------------------------|
| Bilateral conjunctivitis<br><i>If yes, <input type="checkbox"/> purulent <input type="checkbox"/> non-purulent</i> | <input type="checkbox"/> Yes <input type="checkbox"/> No | <input type="checkbox"/> < 1 month <input type="checkbox"/> 1-2 months <input type="checkbox"/> >2 -3 months <input type="checkbox"/> >3-4 months <input type="checkbox"/> >4-5 months<br><input type="checkbox"/> >5-6 months <input type="checkbox"/> >6-7 months <input type="checkbox"/> >7 -8 months <input type="checkbox"/> >8-9 months <input type="checkbox"/> >9 -10 months<br><input type="checkbox"/> >10-11 months <input type="checkbox"/> >11 -12 months <input type="checkbox"/> >12 months <input type="checkbox"/> From the time of discharge<br><input type="checkbox"/> Not sure |
| Lumps or rashes (purple/pink) on toes                                                                              | <input type="checkbox"/> Yes <input type="checkbox"/> No | <input type="checkbox"/> < 1 month <input type="checkbox"/> 1-2 months <input type="checkbox"/> >2 -3 months <input type="checkbox"/> >3-4 months <input type="checkbox"/> >4-5 months<br><input type="checkbox"/> >5-6 months <input type="checkbox"/> >6-7 months <input type="checkbox"/> >7 -8 months <input type="checkbox"/> >8-9 months <input type="checkbox"/> >9 -10 months<br><input type="checkbox"/> >10-11 months <input type="checkbox"/> >11 -12 months <input type="checkbox"/> >12 months <input type="checkbox"/> From the time of discharge<br><input type="checkbox"/> Not sure |
| Skin rash                                                                                                          | <input type="checkbox"/> Yes <input type="checkbox"/> No | <input type="checkbox"/> < 1 month <input type="checkbox"/> 1-2 months <input type="checkbox"/> >2 -3 months <input type="checkbox"/> >3-4 months <input type="checkbox"/> >4-5 months<br><input type="checkbox"/> >5-6 months <input type="checkbox"/> >6-7 months <input type="checkbox"/> >7 -8 months <input type="checkbox"/> >8-9 months <input type="checkbox"/> >9 -10 months<br><input type="checkbox"/> >10-11 months <input type="checkbox"/> >11 -12 months <input type="checkbox"/> >12 months <input type="checkbox"/> From the time of discharge<br><input type="checkbox"/> Not sure |
| Skin rash <i>If yes, tick all body areas that apply:</i>                                                           | <input type="checkbox"/> Yes <input type="checkbox"/> No | <input type="checkbox"/> Face<br><input type="checkbox"/> Trunk (stomach or back)<br><input type="checkbox"/> Arms<br><input type="checkbox"/> Legs<br><input type="checkbox"/> Buttocks<br><input type="checkbox"/> Toes<br><input type="checkbox"/> Fingers<br><input type="checkbox"/> Accompanied by itch                                                                                                                                                                                                                                                                                        |
| Hair loss                                                                                                          | <input type="checkbox"/> Yes <input type="checkbox"/> No | <input type="checkbox"/> < 1 month <input type="checkbox"/> 1-2 months <input type="checkbox"/> >2 -3 months <input type="checkbox"/> >3-4 months <input type="checkbox"/> >4-5 months<br><input type="checkbox"/> >5-6 months <input type="checkbox"/> >6-7 months <input type="checkbox"/> >7 -8 months <input type="checkbox"/> >8-9 months <input type="checkbox"/> >9 -10 months<br><input type="checkbox"/> >10-11 months <input type="checkbox"/> >11 -12 months <input type="checkbox"/> >12 months <input type="checkbox"/> From the time of discharge<br><input type="checkbox"/> Not sure |
| Hyperhidrosis                                                                                                      | <input type="checkbox"/> Yes <input type="checkbox"/> No | <input type="checkbox"/> < 1 month <input type="checkbox"/> 1-2 months <input type="checkbox"/> >2 -3 months <input type="checkbox"/> >3-4 months <input type="checkbox"/> >4-5 months<br><input type="checkbox"/> >5-6 months <input type="checkbox"/> >6-7 months <input type="checkbox"/> >7 -8 months <input type="checkbox"/> >8-9 months <input type="checkbox"/> >9 -10 months<br><input type="checkbox"/> >10-11 months <input type="checkbox"/> >11 -12 months <input type="checkbox"/> >12 months <input type="checkbox"/> From the time of discharge<br><input type="checkbox"/> Not sure |
| <b>Other New Symptoms, if yes, specify all with their duration:</b>                                                |                                                          | <b>If yes, what is the duration of symptoms</b>                                                                                                                                                                                                                                                                                                                                                                                                                                                                                                                                                      |
|                                                                                                                    |                                                          | <input type="checkbox"/> < 1 month <input type="checkbox"/> 1-2 months <input type="checkbox"/> >2 -3 months <input type="checkbox"/> >3-4 months <input type="checkbox"/> >4-5 months<br><input type="checkbox"/> >5-6 months <input type="checkbox"/> >6-7 months <input type="checkbox"/> >7 -8 months <input type="checkbox"/> >8-9 months <input type="checkbox"/> >9 -10 months<br><input type="checkbox"/> >10-11 months <input type="checkbox"/> >11 -12 months <input type="checkbox"/> >12 months <input type="checkbox"/> From the time of discharge<br><input type="checkbox"/> Not sure |
|                                                                                                                    |                                                          | <input type="checkbox"/> < 1 month <input type="checkbox"/> 1-2 months <input type="checkbox"/> >2 -3 months <input type="checkbox"/> >3-4 months <input type="checkbox"/> >4-5 months<br><input type="checkbox"/> >5-6 months <input type="checkbox"/> >6-7 months <input type="checkbox"/> >7 -8 months <input type="checkbox"/> >8-9 months <input type="checkbox"/> >9 -10 months<br><input type="checkbox"/> >10-11 months <input type="checkbox"/> >11 -12 months <input type="checkbox"/> >12 months <input type="checkbox"/> From the time of discharge<br><input type="checkbox"/> Not sure |

**6b. Please report any symptoms that have been bothering your child since discharge that are not present today. Please specify the time of onset and duration of these symptoms**

| <b>Respiratory problems</b>           | <b>Tick Yes or No</b>                                    | <b>If yes, what was the time of onset</b>                                                                                                                                                                                                                                                                                                                                                                                                                                                                                                                                                            |
|---------------------------------------|----------------------------------------------------------|------------------------------------------------------------------------------------------------------------------------------------------------------------------------------------------------------------------------------------------------------------------------------------------------------------------------------------------------------------------------------------------------------------------------------------------------------------------------------------------------------------------------------------------------------------------------------------------------------|
| Nasal congestion / rhinorrhea         | <input type="checkbox"/> Yes <input type="checkbox"/> No | <input type="checkbox"/> < 1 month <input type="checkbox"/> 1-2 months <input type="checkbox"/> >2 -3 months <input type="checkbox"/> >3-4 months <input type="checkbox"/> >4-5 months<br><input type="checkbox"/> >5-6 months <input type="checkbox"/> >6-7 months <input type="checkbox"/> >7 -8 months <input type="checkbox"/> >8-9 months <input type="checkbox"/> >9 -10 months<br><input type="checkbox"/> >10-11 months <input type="checkbox"/> >11 -12 months <input type="checkbox"/> >12 months <input type="checkbox"/> From the time of discharge<br><input type="checkbox"/> Not sure |
|                                       |                                                          | <b>If yes, what was the duration of symptoms</b>                                                                                                                                                                                                                                                                                                                                                                                                                                                                                                                                                     |
|                                       |                                                          | <input type="checkbox"/> < 1 month <input type="checkbox"/> 1-2 months <input type="checkbox"/> >2 -3 months <input type="checkbox"/> >3-4 months <input type="checkbox"/> >4-5 months<br><input type="checkbox"/> >5-6 months <input type="checkbox"/> >6-7 months <input type="checkbox"/> >7 -8 months <input type="checkbox"/> >8-9 months <input type="checkbox"/> >9 -10 months<br><input type="checkbox"/> >10-11 months <input type="checkbox"/> >11 -12 months <input type="checkbox"/> >12 months <input type="checkbox"/> Not sure                                                        |
| Difficulty breathing /chest tightness | <input type="checkbox"/> Yes <input type="checkbox"/> No | <input type="checkbox"/> < 1 month <input type="checkbox"/> 1-2 months <input type="checkbox"/> >2 -3 months <input type="checkbox"/> >3-4 months <input type="checkbox"/> >4-5 months<br><input type="checkbox"/> >5-6 months <input type="checkbox"/> >6-7 months <input type="checkbox"/> >7 -8 months <input type="checkbox"/> >8-9 months <input type="checkbox"/> >9 -10 months<br><input type="checkbox"/> >10-11 months <input type="checkbox"/> >11 -12 months <input type="checkbox"/> >12 months <input type="checkbox"/> From the time of discharge<br><input type="checkbox"/> Not sure |
|                                       |                                                          | <b>If yes, what was the duration of symptoms</b>                                                                                                                                                                                                                                                                                                                                                                                                                                                                                                                                                     |
|                                       |                                                          | <input type="checkbox"/> < 1 month <input type="checkbox"/> 1-2 months <input type="checkbox"/> >2 -3 months <input type="checkbox"/> >3-4 months <input type="checkbox"/> >4-5 months<br><input type="checkbox"/> >5-6 months <input type="checkbox"/> >6-7 months <input type="checkbox"/> >7 -8 months <input type="checkbox"/> >8-9 months <input type="checkbox"/> >9 -10 months<br><input type="checkbox"/> >10-11 months <input type="checkbox"/> >11 -12 months <input type="checkbox"/> >12 months <input type="checkbox"/> Not sure                                                        |
| Pain on breathing                     | <input type="checkbox"/> Yes <input type="checkbox"/> No | <input type="checkbox"/> < 1 month <input type="checkbox"/> 1-2 months <input type="checkbox"/> >2 -3 months <input type="checkbox"/> >3-4 months <input type="checkbox"/> >4-5 months<br><input type="checkbox"/> >5-6 months <input type="checkbox"/> >6-7 months <input type="checkbox"/> >7 -8 months <input type="checkbox"/> >8-9 months <input type="checkbox"/> >9 -10 months<br><input type="checkbox"/> >10-11 months <input type="checkbox"/> >11 -12 months <input type="checkbox"/> >12 months <input type="checkbox"/> From the time of discharge<br><input type="checkbox"/> Not sure |
|                                       |                                                          | <b>If yes, what was the duration of symptoms</b>                                                                                                                                                                                                                                                                                                                                                                                                                                                                                                                                                     |
|                                       |                                                          | <input type="checkbox"/> < 1 month <input type="checkbox"/> 1-2 months <input type="checkbox"/> >2 -3 months <input type="checkbox"/> >3-4 months <input type="checkbox"/> >4-5 months<br><input type="checkbox"/> >5-6 months <input type="checkbox"/> >6-7 months <input type="checkbox"/> >7 -8 months <input type="checkbox"/> >8-9 months <input type="checkbox"/> >9 -10 months<br><input type="checkbox"/> >10-11 months <input type="checkbox"/> >11 -12 months <input type="checkbox"/> >12 months <input type="checkbox"/> Not sure                                                        |
| Chest pain                            | <input type="checkbox"/> Yes <input type="checkbox"/> No | <input type="checkbox"/> < 1 month <input type="checkbox"/> 1-2 months <input type="checkbox"/> >2 -3 months <input type="checkbox"/> >3-4 months <input type="checkbox"/> >4-5 months<br><input type="checkbox"/> >5-6 months <input type="checkbox"/> >6-7 months <input type="checkbox"/> >7 -8 months <input type="checkbox"/> >8-9 months <input type="checkbox"/> >9 -10 months<br><input type="checkbox"/> >10-11 months <input type="checkbox"/> >11 -12 months <input type="checkbox"/> >12 months <input type="checkbox"/> From the time of discharge<br><input type="checkbox"/> Not sure |
|                                       |                                                          | <b>If yes, what was the duration of symptoms</b>                                                                                                                                                                                                                                                                                                                                                                                                                                                                                                                                                     |
|                                       |                                                          | <input type="checkbox"/> < 1 month <input type="checkbox"/> 1-2 months <input type="checkbox"/> >2 -3 months <input type="checkbox"/> >3-4 months <input type="checkbox"/> >4-5 months<br><input type="checkbox"/> >5-6 months <input type="checkbox"/> >6-7 months <input type="checkbox"/> >7 -8 months <input type="checkbox"/> >8-9 months <input type="checkbox"/> >9 -10 months<br><input type="checkbox"/> >10-11 months <input type="checkbox"/> >11 -12 months <input type="checkbox"/> >12 months <input type="checkbox"/> Not sure                                                        |

|                                                                                                                                                                                                                                                                                                                                                                                                                                                                                                                                               |                                                          |                                                                                                                                                                                                                                                                                                                                                                                                                                                                                                                                                                                                      |
|-----------------------------------------------------------------------------------------------------------------------------------------------------------------------------------------------------------------------------------------------------------------------------------------------------------------------------------------------------------------------------------------------------------------------------------------------------------------------------------------------------------------------------------------------|----------------------------------------------------------|------------------------------------------------------------------------------------------------------------------------------------------------------------------------------------------------------------------------------------------------------------------------------------------------------------------------------------------------------------------------------------------------------------------------------------------------------------------------------------------------------------------------------------------------------------------------------------------------------|
| Persistent cough                                                                                                                                                                                                                                                                                                                                                                                                                                                                                                                              | <input type="checkbox"/> Yes <input type="checkbox"/> No | <b>If yes,</b> what was the time of onset                                                                                                                                                                                                                                                                                                                                                                                                                                                                                                                                                            |
|                                                                                                                                                                                                                                                                                                                                                                                                                                                                                                                                               |                                                          | <input type="checkbox"/> < 1 month <input type="checkbox"/> 1-2 months <input type="checkbox"/> >2 -3 months <input type="checkbox"/> >3-4 months <input type="checkbox"/> >4-5 months<br><input type="checkbox"/> >5-6 months <input type="checkbox"/> >6-7 months <input type="checkbox"/> >7 -8 months <input type="checkbox"/> >8-9 months <input type="checkbox"/> >9 -10 months<br><input type="checkbox"/> >10-11 months <input type="checkbox"/> >11 -12 months <input type="checkbox"/> >12 months <input type="checkbox"/> From the time of discharge<br><input type="checkbox"/> Not sure |
|                                                                                                                                                                                                                                                                                                                                                                                                                                                                                                                                               |                                                          | <b>If yes,</b> what was the duration of symptoms                                                                                                                                                                                                                                                                                                                                                                                                                                                                                                                                                     |
| <input type="checkbox"/> < 1 month <input type="checkbox"/> 1-2 months <input type="checkbox"/> >2 -3 months <input type="checkbox"/> >3-4 months <input type="checkbox"/> >4-5 months<br><input type="checkbox"/> >5-6 months <input type="checkbox"/> >6-7 months <input type="checkbox"/> >7 -8 months <input type="checkbox"/> >8-9 months <input type="checkbox"/> >9 -10 months<br><input type="checkbox"/> >10-11 months <input type="checkbox"/> >11 -12 months <input type="checkbox"/> >12 months <input type="checkbox"/> Not sure |                                                          |                                                                                                                                                                                                                                                                                                                                                                                                                                                                                                                                                                                                      |
| <i>If yes, <input type="checkbox"/> dry cough <input type="checkbox"/> with phlegm</i>                                                                                                                                                                                                                                                                                                                                                                                                                                                        |                                                          |                                                                                                                                                                                                                                                                                                                                                                                                                                                                                                                                                                                                      |
| <b>Musculoskeletal problems</b>                                                                                                                                                                                                                                                                                                                                                                                                                                                                                                               | <b>Tick Yes or No</b>                                    | <b>If yes,</b> what was the time of onset                                                                                                                                                                                                                                                                                                                                                                                                                                                                                                                                                            |
| Cannot fully move or control movement                                                                                                                                                                                                                                                                                                                                                                                                                                                                                                         | <input type="checkbox"/> Yes <input type="checkbox"/> No | <b>If yes,</b> what was the time of onset                                                                                                                                                                                                                                                                                                                                                                                                                                                                                                                                                            |
|                                                                                                                                                                                                                                                                                                                                                                                                                                                                                                                                               |                                                          | <input type="checkbox"/> < 1 month <input type="checkbox"/> 1-2 months <input type="checkbox"/> >2 -3 months <input type="checkbox"/> >3-4 months <input type="checkbox"/> >4-5 months<br><input type="checkbox"/> >5-6 months <input type="checkbox"/> >6-7 months <input type="checkbox"/> >7 -8 months <input type="checkbox"/> >8-9 months <input type="checkbox"/> >9 -10 months<br><input type="checkbox"/> >10-11 months <input type="checkbox"/> >11 -12 months <input type="checkbox"/> >12 months <input type="checkbox"/> From the time of discharge<br><input type="checkbox"/> Not sure |
|                                                                                                                                                                                                                                                                                                                                                                                                                                                                                                                                               |                                                          | <b>If yes,</b> what was the duration of symptoms                                                                                                                                                                                                                                                                                                                                                                                                                                                                                                                                                     |
| <input type="checkbox"/> < 1 month <input type="checkbox"/> 1-2 months <input type="checkbox"/> >2 -3 months <input type="checkbox"/> >3-4 months <input type="checkbox"/> >4-5 months<br><input type="checkbox"/> >5-6 months <input type="checkbox"/> >6-7 months <input type="checkbox"/> >7 -8 months <input type="checkbox"/> >8-9 months <input type="checkbox"/> >9 -10 months<br><input type="checkbox"/> >10-11 months <input type="checkbox"/> >11 -12 months <input type="checkbox"/> >12 months <input type="checkbox"/> Not sure |                                                          |                                                                                                                                                                                                                                                                                                                                                                                                                                                                                                                                                                                                      |
| Problems with balance                                                                                                                                                                                                                                                                                                                                                                                                                                                                                                                         | <input type="checkbox"/> Yes <input type="checkbox"/> No | <b>If yes,</b> what was the time of onset                                                                                                                                                                                                                                                                                                                                                                                                                                                                                                                                                            |
|                                                                                                                                                                                                                                                                                                                                                                                                                                                                                                                                               |                                                          | <input type="checkbox"/> < 1 month <input type="checkbox"/> 1-2 months <input type="checkbox"/> >2 -3 months <input type="checkbox"/> >3-4 months <input type="checkbox"/> >4-5 months<br><input type="checkbox"/> >5-6 months <input type="checkbox"/> >6-7 months <input type="checkbox"/> >7 -8 months <input type="checkbox"/> >8-9 months <input type="checkbox"/> >9 -10 months<br><input type="checkbox"/> >10-11 months <input type="checkbox"/> >11 -12 months <input type="checkbox"/> >12 months <input type="checkbox"/> From the time of discharge<br><input type="checkbox"/> Not sure |
|                                                                                                                                                                                                                                                                                                                                                                                                                                                                                                                                               |                                                          | <b>If yes,</b> what was the duration of symptoms                                                                                                                                                                                                                                                                                                                                                                                                                                                                                                                                                     |
| <input type="checkbox"/> < 1 month <input type="checkbox"/> 1-2 months <input type="checkbox"/> >2 -3 months <input type="checkbox"/> >3-4 months <input type="checkbox"/> >4-5 months<br><input type="checkbox"/> >5-6 months <input type="checkbox"/> >6-7 months <input type="checkbox"/> >7 -8 months <input type="checkbox"/> >8-9 months <input type="checkbox"/> >9 -10 months<br><input type="checkbox"/> >10-11 months <input type="checkbox"/> >11 -12 months <input type="checkbox"/> >12 months <input type="checkbox"/> Not sure |                                                          |                                                                                                                                                                                                                                                                                                                                                                                                                                                                                                                                                                                                      |
| Persistent muscle pain                                                                                                                                                                                                                                                                                                                                                                                                                                                                                                                        | <input type="checkbox"/> Yes <input type="checkbox"/> No | <b>If yes,</b> what was the time of onset                                                                                                                                                                                                                                                                                                                                                                                                                                                                                                                                                            |
|                                                                                                                                                                                                                                                                                                                                                                                                                                                                                                                                               |                                                          | <input type="checkbox"/> < 1 month <input type="checkbox"/> 1-2 months <input type="checkbox"/> >2 -3 months <input type="checkbox"/> >3-4 months <input type="checkbox"/> >4-5 months<br><input type="checkbox"/> >5-6 months <input type="checkbox"/> >6-7 months <input type="checkbox"/> >7 -8 months <input type="checkbox"/> >8-9 months <input type="checkbox"/> >9 -10 months<br><input type="checkbox"/> >10-11 months <input type="checkbox"/> >11 -12 months <input type="checkbox"/> >12 months <input type="checkbox"/> From the time of discharge<br><input type="checkbox"/> Not sure |
|                                                                                                                                                                                                                                                                                                                                                                                                                                                                                                                                               |                                                          | <b>If yes,</b> what was the duration of symptoms                                                                                                                                                                                                                                                                                                                                                                                                                                                                                                                                                     |
| <input type="checkbox"/> < 1 month <input type="checkbox"/> 1-2 months <input type="checkbox"/> >2 -3 months <input type="checkbox"/> >3-4 months <input type="checkbox"/> >4-5 months<br><input type="checkbox"/> >5-6 months <input type="checkbox"/> >6-7 months <input type="checkbox"/> >7 -8 months <input type="checkbox"/> >8-9 months <input type="checkbox"/> >9 -10 months<br><input type="checkbox"/> >10-11 months <input type="checkbox"/> >11 -12 months <input type="checkbox"/> >12 months <input type="checkbox"/> Not sure |                                                          |                                                                                                                                                                                                                                                                                                                                                                                                                                                                                                                                                                                                      |
| Joint pain or swelling                                                                                                                                                                                                                                                                                                                                                                                                                                                                                                                        | <input type="checkbox"/> Yes <input type="checkbox"/> No | <b>If yes,</b> what was the time of onset                                                                                                                                                                                                                                                                                                                                                                                                                                                                                                                                                            |
|                                                                                                                                                                                                                                                                                                                                                                                                                                                                                                                                               |                                                          | <input type="checkbox"/> < 1 month <input type="checkbox"/> 1-2 months <input type="checkbox"/> >2 -3 months <input type="checkbox"/> >3-4 months <input type="checkbox"/> >4-5 months<br><input type="checkbox"/> >5-6 months <input type="checkbox"/> >6-7 months <input type="checkbox"/> >7 -8 months <input type="checkbox"/> >8-9 months <input type="checkbox"/> >9 -10 months<br><input type="checkbox"/> >10-11 months <input type="checkbox"/> >11 -12 months <input type="checkbox"/> >12 months <input type="checkbox"/> From the time of discharge<br><input type="checkbox"/> Not sure |

|                                |                                                          |                                                                                                                                                                                                                                                                                                                                                                                                                                                                                                                                                                                                      |
|--------------------------------|----------------------------------------------------------|------------------------------------------------------------------------------------------------------------------------------------------------------------------------------------------------------------------------------------------------------------------------------------------------------------------------------------------------------------------------------------------------------------------------------------------------------------------------------------------------------------------------------------------------------------------------------------------------------|
|                                |                                                          | <b>If yes,</b> what was the duration of symptoms<br><input type="checkbox"/> < 1 month <input type="checkbox"/> 1-2 months <input type="checkbox"/> >2 -3 months <input type="checkbox"/> >3-4 months <input type="checkbox"/> >4-5 months<br><input type="checkbox"/> >5-6 months <input type="checkbox"/> >6-7 months <input type="checkbox"/> >7 -8 months <input type="checkbox"/> >8-9 months <input type="checkbox"/> >9 -10 months<br><input type="checkbox"/> >10-11 months <input type="checkbox"/> >11 -12 months <input type="checkbox"/> >12 months <input type="checkbox"/> Not sure    |
| <b>Neurological problems</b>   | <b>Tick Yes or No</b>                                    | <b>If yes,</b> what was the time of onset                                                                                                                                                                                                                                                                                                                                                                                                                                                                                                                                                            |
| Headache                       | <input type="checkbox"/> Yes <input type="checkbox"/> No | <input type="checkbox"/> < 1 month <input type="checkbox"/> 1-2 months <input type="checkbox"/> >2 -3 months <input type="checkbox"/> >3-4 months <input type="checkbox"/> >4-5 months<br><input type="checkbox"/> >5-6 months <input type="checkbox"/> >6-7 months <input type="checkbox"/> >7 -8 months <input type="checkbox"/> >8-9 months <input type="checkbox"/> >9 -10 months<br><input type="checkbox"/> >10-11 months <input type="checkbox"/> >11 -12 months <input type="checkbox"/> >12 months <input type="checkbox"/> From the time of discharge<br><input type="checkbox"/> Not sure |
|                                |                                                          | <b>If yes,</b> what was the duration of symptoms                                                                                                                                                                                                                                                                                                                                                                                                                                                                                                                                                     |
|                                |                                                          | <input type="checkbox"/> < 1 month <input type="checkbox"/> 1-2 months <input type="checkbox"/> >2 -3 months <input type="checkbox"/> >3-4 months <input type="checkbox"/> >4-5 months<br><input type="checkbox"/> >5-6 months <input type="checkbox"/> >6-7 months <input type="checkbox"/> >7 -8 months <input type="checkbox"/> >8-9 months <input type="checkbox"/> >9 -10 months<br><input type="checkbox"/> >10-11 months <input type="checkbox"/> >11 -12 months <input type="checkbox"/> >12 months <input type="checkbox"/> Not sure                                                        |
| Dizziness/ light headedness    | <input type="checkbox"/> Yes <input type="checkbox"/> No | <b>If yes,</b> what was the time of onset                                                                                                                                                                                                                                                                                                                                                                                                                                                                                                                                                            |
|                                |                                                          | <input type="checkbox"/> < 1 month <input type="checkbox"/> 1-2 months <input type="checkbox"/> >2 -3 months <input type="checkbox"/> >3-4 months <input type="checkbox"/> >4-5 months<br><input type="checkbox"/> >5-6 months <input type="checkbox"/> >6-7 months <input type="checkbox"/> >7 -8 months <input type="checkbox"/> >8-9 months <input type="checkbox"/> >9 -10 months<br><input type="checkbox"/> >10-11 months <input type="checkbox"/> >11 -12 months <input type="checkbox"/> >12 months <input type="checkbox"/> From the time of discharge<br><input type="checkbox"/> Not sure |
|                                |                                                          | <b>If yes,</b> what was the duration of symptoms                                                                                                                                                                                                                                                                                                                                                                                                                                                                                                                                                     |
|                                |                                                          | <input type="checkbox"/> < 1 month <input type="checkbox"/> 1-2 months <input type="checkbox"/> >2 -3 months <input type="checkbox"/> >3-4 months <input type="checkbox"/> >4-5 months<br><input type="checkbox"/> >5-6 months <input type="checkbox"/> >6-7 months <input type="checkbox"/> >7 -8 months <input type="checkbox"/> >8-9 months <input type="checkbox"/> >9 -10 months<br><input type="checkbox"/> >10-11 months <input type="checkbox"/> >11 -12 months <input type="checkbox"/> >12 months <input type="checkbox"/> Not sure                                                        |
| Fainting/ blackouts            | <input type="checkbox"/> Yes <input type="checkbox"/> No | <b>If yes,</b> what was the time of onset                                                                                                                                                                                                                                                                                                                                                                                                                                                                                                                                                            |
|                                |                                                          | <input type="checkbox"/> < 1 month <input type="checkbox"/> 1-2 months <input type="checkbox"/> >2 -3 months <input type="checkbox"/> >3-4 months <input type="checkbox"/> >4-5 months<br><input type="checkbox"/> >5-6 months <input type="checkbox"/> >6-7 months <input type="checkbox"/> >7 -8 months <input type="checkbox"/> >8-9 months <input type="checkbox"/> >9 -10 months<br><input type="checkbox"/> >10-11 months <input type="checkbox"/> >11 -12 months <input type="checkbox"/> >12 months <input type="checkbox"/> From the time of discharge<br><input type="checkbox"/> Not sure |
|                                |                                                          | <b>If yes,</b> what was the duration of symptoms                                                                                                                                                                                                                                                                                                                                                                                                                                                                                                                                                     |
|                                |                                                          | <input type="checkbox"/> < 1 month <input type="checkbox"/> 1-2 months <input type="checkbox"/> >2 -3 months <input type="checkbox"/> >3-4 months <input type="checkbox"/> >4-5 months<br><input type="checkbox"/> >5-6 months <input type="checkbox"/> >6-7 months <input type="checkbox"/> >7 -8 months <input type="checkbox"/> >8-9 months <input type="checkbox"/> >9 -10 months<br><input type="checkbox"/> >10-11 months <input type="checkbox"/> >11 -12 months <input type="checkbox"/> >12 months <input type="checkbox"/> Not sure                                                        |
| Problems seeing/blurred vision | <input type="checkbox"/> Yes <input type="checkbox"/> No | <b>If yes,</b> what was the time of onset                                                                                                                                                                                                                                                                                                                                                                                                                                                                                                                                                            |
|                                |                                                          | <input type="checkbox"/> < 1 month <input type="checkbox"/> 1-2 months <input type="checkbox"/> >2 -3 months <input type="checkbox"/> >3-4 months <input type="checkbox"/> >4-5 months<br><input type="checkbox"/> >5-6 months <input type="checkbox"/> >6-7 months <input type="checkbox"/> >7 -8 months <input type="checkbox"/> >8-9 months <input type="checkbox"/> >9 -10 months<br><input type="checkbox"/> >10-11 months <input type="checkbox"/> >11 -12 months <input type="checkbox"/> >12 months <input type="checkbox"/> From the time of discharge<br><input type="checkbox"/> Not sure |
|                                |                                                          | <b>If yes,</b> what was the duration of symptoms                                                                                                                                                                                                                                                                                                                                                                                                                                                                                                                                                     |
|                                |                                                          | <input type="checkbox"/> < 1 month <input type="checkbox"/> 1-2 months <input type="checkbox"/> >2 -3 months <input type="checkbox"/> >3-4 months <input type="checkbox"/> >4-5 months<br><input type="checkbox"/> >5-6 months <input type="checkbox"/> >6-7 months <input type="checkbox"/> >7 -8 months <input type="checkbox"/> >8-9 months <input type="checkbox"/> >9 -10 months<br><input type="checkbox"/> >10-11 months <input type="checkbox"/> >11 -12 months <input type="checkbox"/> >12 months <input type="checkbox"/> Not sure                                                        |
| Disturbed smell                | <input type="checkbox"/> Yes <input type="checkbox"/> No | <b>If yes,</b> what was the time of onset                                                                                                                                                                                                                                                                                                                                                                                                                                                                                                                                                            |
|                                |                                                          | <input type="checkbox"/> < 1 month <input type="checkbox"/> 1-2 months <input type="checkbox"/> >2 -3 months <input type="checkbox"/> >3-4 months <input type="checkbox"/> >4-5 months                                                                                                                                                                                                                                                                                                                                                                                                               |

|                  |                                                          |                                                                                                                                                                                                                                                                                                                                                                                                                                                                                                                                                                                                                                                                                                                                                                                                                                                                                                                                                                                                                                                                                                                                                                                                                                                        |
|------------------|----------------------------------------------------------|--------------------------------------------------------------------------------------------------------------------------------------------------------------------------------------------------------------------------------------------------------------------------------------------------------------------------------------------------------------------------------------------------------------------------------------------------------------------------------------------------------------------------------------------------------------------------------------------------------------------------------------------------------------------------------------------------------------------------------------------------------------------------------------------------------------------------------------------------------------------------------------------------------------------------------------------------------------------------------------------------------------------------------------------------------------------------------------------------------------------------------------------------------------------------------------------------------------------------------------------------------|
|                  |                                                          | <input type="checkbox"/> >5-6 months <input type="checkbox"/> >6-7 months <input type="checkbox"/> >7 -8 months <input type="checkbox"/> >8-9 months <input type="checkbox"/> >9 -10 months<br><input type="checkbox"/> >10-11 months <input type="checkbox"/> >11 -12 months <input type="checkbox"/> >12 months <input type="checkbox"/> From the time of discharge<br><input type="checkbox"/> Not sure<br><b>If yes, what was the duration of symptoms</b><br><input type="checkbox"/> < 1 month <input type="checkbox"/> 1-2 months <input type="checkbox"/> >2 -3 months <input type="checkbox"/> >3-4 months <input type="checkbox"/> >4-5 months<br><input type="checkbox"/> >5-6 months <input type="checkbox"/> >6-7 months <input type="checkbox"/> >7 -8 months <input type="checkbox"/> >8-9 months <input type="checkbox"/> >9 -10 months<br><input type="checkbox"/> >10-11 months <input type="checkbox"/> >11 -12 months <input type="checkbox"/> >12 months <input type="checkbox"/> Not sure                                                                                                                                                                                                                                        |
| Loss of smell    | <input type="checkbox"/> Yes <input type="checkbox"/> No | <b>If yes, what was the time of onset</b><br><input type="checkbox"/> < 1 month <input type="checkbox"/> 1-2 months <input type="checkbox"/> >2 -3 months <input type="checkbox"/> >3-4 months <input type="checkbox"/> >4-5 months<br><input type="checkbox"/> >5-6 months <input type="checkbox"/> >6-7 months <input type="checkbox"/> >7 -8 months <input type="checkbox"/> >8-9 months <input type="checkbox"/> >9 -10 months<br><input type="checkbox"/> >10-11 months <input type="checkbox"/> >11 -12 months <input type="checkbox"/> >12 months <input type="checkbox"/> From the time of discharge<br><input type="checkbox"/> Not sure<br><b>If yes, what was the duration of symptoms</b><br><input type="checkbox"/> < 1 month <input type="checkbox"/> 1-2 months <input type="checkbox"/> >2 -3 months <input type="checkbox"/> >3-4 months <input type="checkbox"/> >4-5 months<br><input type="checkbox"/> >5-6 months <input type="checkbox"/> >6-7 months <input type="checkbox"/> >7 -8 months <input type="checkbox"/> >8-9 months <input type="checkbox"/> >9 -10 months<br><input type="checkbox"/> >10-11 months <input type="checkbox"/> >11 -12 months <input type="checkbox"/> >12 months <input type="checkbox"/> Not sure |
| Disturbed taste  | <input type="checkbox"/> Yes <input type="checkbox"/> No | <b>If yes, what was the time of onset</b><br><input type="checkbox"/> < 1 month <input type="checkbox"/> 1-2 months <input type="checkbox"/> >2 -3 months <input type="checkbox"/> >3-4 months <input type="checkbox"/> >4-5 months<br><input type="checkbox"/> >5-6 months <input type="checkbox"/> >6-7 months <input type="checkbox"/> >7 -8 months <input type="checkbox"/> >8-9 months <input type="checkbox"/> >9 -10 months<br><input type="checkbox"/> >10-11 months <input type="checkbox"/> >11 -12 months <input type="checkbox"/> >12 months <input type="checkbox"/> From the time of discharge<br><input type="checkbox"/> Not sure<br><b>If yes, what was the duration of symptoms</b><br><input type="checkbox"/> < 1 month <input type="checkbox"/> 1-2 months <input type="checkbox"/> >2 -3 months <input type="checkbox"/> >3-4 months <input type="checkbox"/> >4-5 months<br><input type="checkbox"/> >5-6 months <input type="checkbox"/> >6-7 months <input type="checkbox"/> >7 -8 months <input type="checkbox"/> >8-9 months <input type="checkbox"/> >9 -10 months<br><input type="checkbox"/> >10-11 months <input type="checkbox"/> >11 -12 months <input type="checkbox"/> >12 months <input type="checkbox"/> Not sure |
| Loss of taste    | <input type="checkbox"/> Yes <input type="checkbox"/> No | <b>If yes, what was the time of onset</b><br><input type="checkbox"/> < 1 month <input type="checkbox"/> 1-2 months <input type="checkbox"/> >2 -3 months <input type="checkbox"/> >3-4 months <input type="checkbox"/> >4-5 months<br><input type="checkbox"/> >5-6 months <input type="checkbox"/> >6-7 months <input type="checkbox"/> >7 -8 months <input type="checkbox"/> >8-9 months <input type="checkbox"/> >9 -10 months<br><input type="checkbox"/> >10-11 months <input type="checkbox"/> >11 -12 months <input type="checkbox"/> >12 months <input type="checkbox"/> From the time of discharge<br><input type="checkbox"/> Not sure<br><b>If yes, what was the duration of symptoms</b><br><input type="checkbox"/> < 1 month <input type="checkbox"/> 1-2 months <input type="checkbox"/> >2 -3 months <input type="checkbox"/> >3-4 months <input type="checkbox"/> >4-5 months<br><input type="checkbox"/> >5-6 months <input type="checkbox"/> >6-7 months <input type="checkbox"/> >7 -8 months <input type="checkbox"/> >8-9 months <input type="checkbox"/> >9 -10 months<br><input type="checkbox"/> >10-11 months <input type="checkbox"/> >11 -12 months <input type="checkbox"/> >12 months <input type="checkbox"/> Not sure |
| Tremor/shakiness | <input type="checkbox"/> Yes <input type="checkbox"/> No | <b>If yes, what was the time of onset</b><br><input type="checkbox"/> < 1 month <input type="checkbox"/> 1-2 months <input type="checkbox"/> >2 -3 months <input type="checkbox"/> >3-4 months <input type="checkbox"/> >4-5 months<br><input type="checkbox"/> >5-6 months <input type="checkbox"/> >6-7 months <input type="checkbox"/> >7 -8 months <input type="checkbox"/> >8-9 months <input type="checkbox"/> >9 -10 months<br><input type="checkbox"/> >10-11 months <input type="checkbox"/> >11 -12 months <input type="checkbox"/> >12 months <input type="checkbox"/> From the time of discharge<br><input type="checkbox"/> Not sure<br><b>If yes, what was the duration of symptoms</b><br><input type="checkbox"/> < 1 month <input type="checkbox"/> 1-2 months <input type="checkbox"/> >2 -3 months <input type="checkbox"/> >3-4 months <input type="checkbox"/> >4-5 months<br><input type="checkbox"/> >5-6 months <input type="checkbox"/> >6-7 months <input type="checkbox"/> >7 -8 months <input type="checkbox"/> >8-9 months <input type="checkbox"/> >9 -10 months                                                                                                                                                         |



|                                                              |                                                          |                                                                                                                                                                                                                                                                                                                                                                                                                                                                                                                                                                                                      |
|--------------------------------------------------------------|----------------------------------------------------------|------------------------------------------------------------------------------------------------------------------------------------------------------------------------------------------------------------------------------------------------------------------------------------------------------------------------------------------------------------------------------------------------------------------------------------------------------------------------------------------------------------------------------------------------------------------------------------------------------|
|                                                              |                                                          | <input type="checkbox"/> >10-11 months <input type="checkbox"/> >11 -12 months <input type="checkbox"/> >12 months <input type="checkbox"/> Not sure                                                                                                                                                                                                                                                                                                                                                                                                                                                 |
| Tingling feeling/ “pins and needles“                         | <input type="checkbox"/> Yes <input type="checkbox"/> No | <b>If yes,</b> what was the time of onset                                                                                                                                                                                                                                                                                                                                                                                                                                                                                                                                                            |
|                                                              |                                                          | <input type="checkbox"/> < 1 month <input type="checkbox"/> 1-2 months <input type="checkbox"/> >2 -3 months <input type="checkbox"/> >3-4 months <input type="checkbox"/> >4-5 months<br><input type="checkbox"/> >5-6 months <input type="checkbox"/> >6-7 months <input type="checkbox"/> >7 -8 months <input type="checkbox"/> >8-9 months <input type="checkbox"/> >9 -10 months<br><input type="checkbox"/> >10-11 months <input type="checkbox"/> >11 -12 months <input type="checkbox"/> >12 months <input type="checkbox"/> From the time of discharge<br><input type="checkbox"/> Not sure |
|                                                              |                                                          | <b>If yes,</b> what was the duration of symptoms                                                                                                                                                                                                                                                                                                                                                                                                                                                                                                                                                     |
|                                                              |                                                          | <input type="checkbox"/> < 1 month <input type="checkbox"/> 1-2 months <input type="checkbox"/> >2 -3 months <input type="checkbox"/> >3-4 months <input type="checkbox"/> >4-5 months<br><input type="checkbox"/> >5-6 months <input type="checkbox"/> >6-7 months <input type="checkbox"/> >7 -8 months <input type="checkbox"/> >8-9 months <input type="checkbox"/> >9 -10 months<br><input type="checkbox"/> >10-11 months <input type="checkbox"/> >11 -12 months <input type="checkbox"/> >12 months <input type="checkbox"/> Not sure                                                        |
| Seizures/fits                                                | <input type="checkbox"/> Yes <input type="checkbox"/> No | <b>If yes,</b> what was the time of onset                                                                                                                                                                                                                                                                                                                                                                                                                                                                                                                                                            |
|                                                              |                                                          | <input type="checkbox"/> < 1 month <input type="checkbox"/> 1-2 months <input type="checkbox"/> >2 -3 months <input type="checkbox"/> >3-4 months <input type="checkbox"/> >4-5 months<br><input type="checkbox"/> >5-6 months <input type="checkbox"/> >6-7 months <input type="checkbox"/> >7 -8 months <input type="checkbox"/> >8-9 months <input type="checkbox"/> >9 -10 months<br><input type="checkbox"/> >10-11 months <input type="checkbox"/> >11 -12 months <input type="checkbox"/> >12 months <input type="checkbox"/> From the time of discharge<br><input type="checkbox"/> Not sure |
|                                                              |                                                          | <b>If yes,</b> what was the duration of symptoms                                                                                                                                                                                                                                                                                                                                                                                                                                                                                                                                                     |
|                                                              |                                                          | <input type="checkbox"/> < 1 month <input type="checkbox"/> 1-2 months <input type="checkbox"/> >2 -3 months <input type="checkbox"/> >3-4 months <input type="checkbox"/> >4-5 months<br><input type="checkbox"/> >5-6 months <input type="checkbox"/> >6-7 months <input type="checkbox"/> >7 -8 months <input type="checkbox"/> >8-9 months <input type="checkbox"/> >9 -10 months<br><input type="checkbox"/> >10-11 months <input type="checkbox"/> >11 -12 months <input type="checkbox"/> >12 months <input type="checkbox"/> Not sure                                                        |
| Confusion/lack of concentration                              | <input type="checkbox"/> Yes <input type="checkbox"/> No | <b>If yes,</b> what was the time of onset                                                                                                                                                                                                                                                                                                                                                                                                                                                                                                                                                            |
|                                                              |                                                          | <input type="checkbox"/> < 1 month <input type="checkbox"/> 1-2 months <input type="checkbox"/> >2 -3 months <input type="checkbox"/> >3-4 months <input type="checkbox"/> >4-5 months<br><input type="checkbox"/> >5-6 months <input type="checkbox"/> >6-7 months <input type="checkbox"/> >7 -8 months <input type="checkbox"/> >8-9 months <input type="checkbox"/> >9 -10 months<br><input type="checkbox"/> >10-11 months <input type="checkbox"/> >11 -12 months <input type="checkbox"/> >12 months <input type="checkbox"/> From the time of discharge<br><input type="checkbox"/> Not sure |
|                                                              |                                                          | <b>If yes,</b> what was the duration of symptoms                                                                                                                                                                                                                                                                                                                                                                                                                                                                                                                                                     |
|                                                              |                                                          | <input type="checkbox"/> < 1 month <input type="checkbox"/> 1-2 months <input type="checkbox"/> >2 -3 months <input type="checkbox"/> >3-4 months <input type="checkbox"/> >4-5 months<br><input type="checkbox"/> >5-6 months <input type="checkbox"/> >6-7 months <input type="checkbox"/> >7 -8 months <input type="checkbox"/> >8-9 months <input type="checkbox"/> >9 -10 months<br><input type="checkbox"/> >10-11 months <input type="checkbox"/> >11 -12 months <input type="checkbox"/> >12 months <input type="checkbox"/> Not sure                                                        |
| Problems speaking or communicating                           | <input type="checkbox"/> Yes <input type="checkbox"/> No | <b>If yes,</b> what was the time of onset                                                                                                                                                                                                                                                                                                                                                                                                                                                                                                                                                            |
|                                                              |                                                          | <input type="checkbox"/> < 1 month <input type="checkbox"/> 1-2 months <input type="checkbox"/> >2 -3 months <input type="checkbox"/> >3-4 months <input type="checkbox"/> >4-5 months<br><input type="checkbox"/> >5-6 months <input type="checkbox"/> >6-7 months <input type="checkbox"/> >7 -8 months <input type="checkbox"/> >8-9 months <input type="checkbox"/> >9 -10 months<br><input type="checkbox"/> >10-11 months <input type="checkbox"/> >11 -12 months <input type="checkbox"/> >12 months <input type="checkbox"/> From the time of discharge<br><input type="checkbox"/> Not sure |
|                                                              |                                                          | <b>If yes,</b> what was the duration of symptoms                                                                                                                                                                                                                                                                                                                                                                                                                                                                                                                                                     |
|                                                              |                                                          | <input type="checkbox"/> < 1 month <input type="checkbox"/> 1-2 months <input type="checkbox"/> >2 -3 months <input type="checkbox"/> >3-4 months <input type="checkbox"/> >4-5 months<br><input type="checkbox"/> >5-6 months <input type="checkbox"/> >6-7 months <input type="checkbox"/> >7 -8 months <input type="checkbox"/> >8-9 months <input type="checkbox"/> >9 -10 months<br><input type="checkbox"/> >10-11 months <input type="checkbox"/> >11 -12 months <input type="checkbox"/> >12 months <input type="checkbox"/> Not sure                                                        |
| Insomnia ( <i>hard to fall asleep, hard to stay asleep</i> ) | <input type="checkbox"/> Yes <input type="checkbox"/> No | <b>If yes,</b> what was the time of onset                                                                                                                                                                                                                                                                                                                                                                                                                                                                                                                                                            |
|                                                              |                                                          | <input type="checkbox"/> < 1 month <input type="checkbox"/> 1-2 months <input type="checkbox"/> >2 -3 months <input type="checkbox"/> >3-4 months <input type="checkbox"/> >4-5 months<br><input type="checkbox"/> >5-6 months <input type="checkbox"/> >6-7 months <input type="checkbox"/> >7 -8 months <input type="checkbox"/> >8-9 months <input type="checkbox"/> >9 -10 months<br><input type="checkbox"/> >10-11 months <input type="checkbox"/> >11 -12 months <input type="checkbox"/> >12 months <input type="checkbox"/> From the time of discharge<br><input type="checkbox"/> Not sure |



|                                                                                  |                                                          |                                                                                                                                                                                                                                                                                                                                                                                                                                                                                                                                                                                                                                                                                                                                                                                                                                                                                                                                                                                                                                                                                                                                                                                                                                                        |
|----------------------------------------------------------------------------------|----------------------------------------------------------|--------------------------------------------------------------------------------------------------------------------------------------------------------------------------------------------------------------------------------------------------------------------------------------------------------------------------------------------------------------------------------------------------------------------------------------------------------------------------------------------------------------------------------------------------------------------------------------------------------------------------------------------------------------------------------------------------------------------------------------------------------------------------------------------------------------------------------------------------------------------------------------------------------------------------------------------------------------------------------------------------------------------------------------------------------------------------------------------------------------------------------------------------------------------------------------------------------------------------------------------------------|
|                                                                                  |                                                          | <b>If yes,</b> what was the duration of symptoms<br><input type="checkbox"/> < 1 month <input type="checkbox"/> 1-2 months <input type="checkbox"/> >2 -3 months <input type="checkbox"/> >3-4 months <input type="checkbox"/> >4-5 months<br><input type="checkbox"/> >5-6 months <input type="checkbox"/> >6-7 months <input type="checkbox"/> >7 -8 months <input type="checkbox"/> >8-9 months <input type="checkbox"/> >9 -10 months<br><input type="checkbox"/> >10-11 months <input type="checkbox"/> >11 -12 months <input type="checkbox"/> >12 months <input type="checkbox"/> Not sure                                                                                                                                                                                                                                                                                                                                                                                                                                                                                                                                                                                                                                                      |
| Hypersomnia ( <i>excessive daytime sleepiness or prolonged nighttime sleep</i> ) | <input type="checkbox"/> Yes <input type="checkbox"/> No | <b>If yes,</b> what was the time of onset<br><input type="checkbox"/> < 1 month <input type="checkbox"/> 1-2 months <input type="checkbox"/> >2 -3 months <input type="checkbox"/> >3-4 months <input type="checkbox"/> >4-5 months<br><input type="checkbox"/> >5-6 months <input type="checkbox"/> >6-7 months <input type="checkbox"/> >7 -8 months <input type="checkbox"/> >8-9 months <input type="checkbox"/> >9 -10 months<br><input type="checkbox"/> >10-11 months <input type="checkbox"/> >11 -12 months <input type="checkbox"/> >12 months <input type="checkbox"/> From the time of discharge<br><input type="checkbox"/> Not sure<br><b>If yes,</b> what was the duration of symptoms<br><input type="checkbox"/> < 1 month <input type="checkbox"/> 1-2 months <input type="checkbox"/> >2 -3 months <input type="checkbox"/> >3-4 months <input type="checkbox"/> >4-5 months<br><input type="checkbox"/> >5-6 months <input type="checkbox"/> >6-7 months <input type="checkbox"/> >7 -8 months <input type="checkbox"/> >8-9 months <input type="checkbox"/> >9 -10 months<br><input type="checkbox"/> >10-11 months <input type="checkbox"/> >11 -12 months <input type="checkbox"/> >12 months <input type="checkbox"/> Not sure |
| Fatigue                                                                          | <input type="checkbox"/> Yes <input type="checkbox"/> No | <b>If yes,</b> what was the time of onset<br><input type="checkbox"/> < 1 month <input type="checkbox"/> 1-2 months <input type="checkbox"/> >2 -3 months <input type="checkbox"/> >3-4 months <input type="checkbox"/> >4-5 months<br><input type="checkbox"/> >5-6 months <input type="checkbox"/> >6-7 months <input type="checkbox"/> >7 -8 months <input type="checkbox"/> >8-9 months <input type="checkbox"/> >9 -10 months<br><input type="checkbox"/> >10-11 months <input type="checkbox"/> >11 -12 months <input type="checkbox"/> >12 months <input type="checkbox"/> From the time of discharge<br><input type="checkbox"/> Not sure<br><b>If yes,</b> what was the duration of symptoms<br><input type="checkbox"/> < 1 month <input type="checkbox"/> 1-2 months <input type="checkbox"/> >2 -3 months <input type="checkbox"/> >3-4 months <input type="checkbox"/> >4-5 months<br><input type="checkbox"/> >5-6 months <input type="checkbox"/> >6-7 months <input type="checkbox"/> >7 -8 months <input type="checkbox"/> >8-9 months <input type="checkbox"/> >9 -10 months<br><input type="checkbox"/> >10-11 months <input type="checkbox"/> >11 -12 months <input type="checkbox"/> >12 months <input type="checkbox"/> Not sure |
| <b>Gastrointestinal problems</b>                                                 | <b>Tick Yes or No</b>                                    | <b>If yes,</b> what was the time of onset                                                                                                                                                                                                                                                                                                                                                                                                                                                                                                                                                                                                                                                                                                                                                                                                                                                                                                                                                                                                                                                                                                                                                                                                              |
| Weight loss                                                                      | <input type="checkbox"/> Yes <input type="checkbox"/> No | <input type="checkbox"/> < 1 month <input type="checkbox"/> 1-2 months <input type="checkbox"/> >2 -3 months <input type="checkbox"/> >3-4 months <input type="checkbox"/> >4-5 months<br><input type="checkbox"/> >5-6 months <input type="checkbox"/> >6-7 months <input type="checkbox"/> >7 -8 months <input type="checkbox"/> >8-9 months <input type="checkbox"/> >9 -10 months<br><input type="checkbox"/> >10-11 months <input type="checkbox"/> >11 -12 months <input type="checkbox"/> >12 months <input type="checkbox"/> From the time of discharge<br><input type="checkbox"/> Not sure<br><b>If yes,</b> what was the duration of symptoms<br><input type="checkbox"/> < 1 month <input type="checkbox"/> 1-2 months <input type="checkbox"/> >2 -3 months <input type="checkbox"/> >3-4 months <input type="checkbox"/> >4-5 months<br><input type="checkbox"/> >5-6 months <input type="checkbox"/> >6-7 months <input type="checkbox"/> >7 -8 months <input type="checkbox"/> >8-9 months <input type="checkbox"/> >9 -10 months<br><input type="checkbox"/> >10-11 months <input type="checkbox"/> >11 -12 months <input type="checkbox"/> >12 months <input type="checkbox"/> Not sure                                              |
| Problems swallowing or chewing                                                   | <input type="checkbox"/> Yes <input type="checkbox"/> No | <b>If yes,</b> what was the time of onset<br><input type="checkbox"/> < 1 month <input type="checkbox"/> 1-2 months <input type="checkbox"/> >2 -3 months <input type="checkbox"/> >3-4 months <input type="checkbox"/> >4-5 months<br><input type="checkbox"/> >5-6 months <input type="checkbox"/> >6-7 months <input type="checkbox"/> >7 -8 months <input type="checkbox"/> >8-9 months <input type="checkbox"/> >9 -10 months<br><input type="checkbox"/> >10-11 months <input type="checkbox"/> >11 -12 months <input type="checkbox"/> >12 months <input type="checkbox"/> From the time of discharge<br><input type="checkbox"/> Not sure<br><b>If yes,</b> what was the duration of symptoms<br><input type="checkbox"/> < 1 month <input type="checkbox"/> 1-2 months <input type="checkbox"/> >2 -3 months <input type="checkbox"/> >3-4 months <input type="checkbox"/> >4-5 months<br><input type="checkbox"/> >5-6 months <input type="checkbox"/> >6-7 months <input type="checkbox"/> >7 -8 months <input type="checkbox"/> >8-9 months <input type="checkbox"/> >9 -10 months<br><input type="checkbox"/> >10-11 months <input type="checkbox"/> >11 -12 months <input type="checkbox"/> >12 months <input type="checkbox"/> Not sure |
| Poor appetite                                                                    | <input type="checkbox"/> Yes <input type="checkbox"/> No | <b>If yes,</b> what was the time of onset                                                                                                                                                                                                                                                                                                                                                                                                                                                                                                                                                                                                                                                                                                                                                                                                                                                                                                                                                                                                                                                                                                                                                                                                              |

|                         |                                                          |                                                                                                                                                                                                                                                                                                                                                                                                                                                                                                                                                                                                                                                                                                       |
|-------------------------|----------------------------------------------------------|-------------------------------------------------------------------------------------------------------------------------------------------------------------------------------------------------------------------------------------------------------------------------------------------------------------------------------------------------------------------------------------------------------------------------------------------------------------------------------------------------------------------------------------------------------------------------------------------------------------------------------------------------------------------------------------------------------|
|                         |                                                          | <input type="checkbox"/> < 1 month <input type="checkbox"/> 1-2 months <input type="checkbox"/> >2 -3 months <input type="checkbox"/> >3-4 months <input type="checkbox"/> >4-5 months<br><input type="checkbox"/> >5-6 months <input type="checkbox"/> >6-7 months <input type="checkbox"/> >7 -8 months <input type="checkbox"/> >8-9 months <input type="checkbox"/> >9 -10 months<br><input type="checkbox"/> >10-11 months <input type="checkbox"/> >11 -12 months <input type="checkbox"/> >12 months <input type="checkbox"/> From the time of discharge<br><input type="checkbox"/> Not sure<br><b>If yes, what was the duration of symptoms</b>                                              |
|                         |                                                          | <input type="checkbox"/> < 1 month <input type="checkbox"/> 1-2 months <input type="checkbox"/> >2 -3 months <input type="checkbox"/> >3-4 months <input type="checkbox"/> >4-5 months<br><input type="checkbox"/> >5-6 months <input type="checkbox"/> >6-7 months <input type="checkbox"/> >7 -8 months <input type="checkbox"/> >8-9 months <input type="checkbox"/> >9 -10 months<br><input type="checkbox"/> >10-11 months <input type="checkbox"/> >11 -12 months <input type="checkbox"/> >12 months <input type="checkbox"/> Not sure<br><b>If yes, what was the duration of symptoms</b>                                                                                                     |
| Diarrhea                | <input type="checkbox"/> Yes <input type="checkbox"/> No | <b>If yes, what was the time of onset</b><br><input type="checkbox"/> < 1 month <input type="checkbox"/> 1-2 months <input type="checkbox"/> >2 -3 months <input type="checkbox"/> >3-4 months <input type="checkbox"/> >4-5 months<br><input type="checkbox"/> >5-6 months <input type="checkbox"/> >6-7 months <input type="checkbox"/> >7 -8 months <input type="checkbox"/> >8-9 months <input type="checkbox"/> >9 -10 months<br><input type="checkbox"/> >10-11 months <input type="checkbox"/> >11 -12 months <input type="checkbox"/> >12 months <input type="checkbox"/> From the time of discharge<br><input type="checkbox"/> Not sure<br><b>If yes, what was the duration of symptoms</b> |
|                         |                                                          | <input type="checkbox"/> < 1 month <input type="checkbox"/> 1-2 months <input type="checkbox"/> >2 -3 months <input type="checkbox"/> >3-4 months <input type="checkbox"/> >4-5 months<br><input type="checkbox"/> >5-6 months <input type="checkbox"/> >6-7 months <input type="checkbox"/> >7 -8 months <input type="checkbox"/> >8-9 months <input type="checkbox"/> >9 -10 months<br><input type="checkbox"/> >10-11 months <input type="checkbox"/> >11 -12 months <input type="checkbox"/> >12 months <input type="checkbox"/> Not sure<br><b>If yes, what was the duration of symptoms</b>                                                                                                     |
| Stomach/ abdominal pain | <input type="checkbox"/> Yes <input type="checkbox"/> No | <b>If yes, what was the time of onset</b><br><input type="checkbox"/> < 1 month <input type="checkbox"/> 1-2 months <input type="checkbox"/> >2 -3 months <input type="checkbox"/> >3-4 months <input type="checkbox"/> >4-5 months<br><input type="checkbox"/> >5-6 months <input type="checkbox"/> >6-7 months <input type="checkbox"/> >7 -8 months <input type="checkbox"/> >8-9 months <input type="checkbox"/> >9 -10 months<br><input type="checkbox"/> >10-11 months <input type="checkbox"/> >11 -12 months <input type="checkbox"/> >12 months <input type="checkbox"/> From the time of discharge<br><input type="checkbox"/> Not sure<br><b>If yes, what was the duration of symptoms</b> |
|                         |                                                          | <input type="checkbox"/> < 1 month <input type="checkbox"/> 1-2 months <input type="checkbox"/> >2 -3 months <input type="checkbox"/> >3-4 months <input type="checkbox"/> >4-5 months<br><input type="checkbox"/> >5-6 months <input type="checkbox"/> >6-7 months <input type="checkbox"/> >7 -8 months <input type="checkbox"/> >8-9 months <input type="checkbox"/> >9 -10 months<br><input type="checkbox"/> >10-11 months <input type="checkbox"/> >11 -12 months <input type="checkbox"/> >12 months <input type="checkbox"/> Not sure<br><b>If yes, what was the duration of symptoms</b>                                                                                                     |
| Feeling nauseous        | <input type="checkbox"/> Yes <input type="checkbox"/> No | <b>If yes, what was the time of onset</b><br><input type="checkbox"/> < 1 month <input type="checkbox"/> 1-2 months <input type="checkbox"/> >2 -3 months <input type="checkbox"/> >3-4 months <input type="checkbox"/> >4-5 months<br><input type="checkbox"/> >5-6 months <input type="checkbox"/> >6-7 months <input type="checkbox"/> >7 -8 months <input type="checkbox"/> >8-9 months <input type="checkbox"/> >9 -10 months<br><input type="checkbox"/> >10-11 months <input type="checkbox"/> >11 -12 months <input type="checkbox"/> >12 months <input type="checkbox"/> From the time of discharge<br><input type="checkbox"/> Not sure<br><b>If yes, what was the duration of symptoms</b> |
|                         |                                                          | <input type="checkbox"/> < 1 month <input type="checkbox"/> 1-2 months <input type="checkbox"/> >2 -3 months <input type="checkbox"/> >3-4 months <input type="checkbox"/> >4-5 months<br><input type="checkbox"/> >5-6 months <input type="checkbox"/> >6-7 months <input type="checkbox"/> >7 -8 months <input type="checkbox"/> >8-9 months <input type="checkbox"/> >9 -10 months<br><input type="checkbox"/> >10-11 months <input type="checkbox"/> >11 -12 months <input type="checkbox"/> >12 months <input type="checkbox"/> Not sure<br><b>If yes, what was the duration of symptoms</b>                                                                                                     |
| Vomiting                | <input type="checkbox"/> Yes <input type="checkbox"/> No | <b>If yes, what was the time of onset</b><br><input type="checkbox"/> < 1 month <input type="checkbox"/> 1-2 months <input type="checkbox"/> >2 -3 months <input type="checkbox"/> >3-4 months <input type="checkbox"/> >4-5 months<br><input type="checkbox"/> >5-6 months <input type="checkbox"/> >6-7 months <input type="checkbox"/> >7 -8 months <input type="checkbox"/> >8-9 months <input type="checkbox"/> >9 -10 months<br><input type="checkbox"/> >10-11 months <input type="checkbox"/> >11 -12 months <input type="checkbox"/> >12 months <input type="checkbox"/> From the time of discharge<br><input type="checkbox"/> Not sure<br><b>If yes, what was the duration of symptoms</b> |
|                         |                                                          | <input type="checkbox"/> < 1 month <input type="checkbox"/> 1-2 months <input type="checkbox"/> >2 -3 months <input type="checkbox"/> >3-4 months <input type="checkbox"/> >4-5 months                                                                                                                                                                                                                                                                                                                                                                                                                                                                                                                |

|                                                       |                                                          |                                                                                                                                                                                                                                                                                                                                                                                                                                                                                                                                                                                                                                                   |
|-------------------------------------------------------|----------------------------------------------------------|---------------------------------------------------------------------------------------------------------------------------------------------------------------------------------------------------------------------------------------------------------------------------------------------------------------------------------------------------------------------------------------------------------------------------------------------------------------------------------------------------------------------------------------------------------------------------------------------------------------------------------------------------|
|                                                       |                                                          | <input type="checkbox"/> >5-6 months <input type="checkbox"/> >6-7 months <input type="checkbox"/> >7 -8 months <input type="checkbox"/> >8-9 months <input type="checkbox"/> >9 -10 months<br><input type="checkbox"/> >10-11 months <input type="checkbox"/> >11 -12 months <input type="checkbox"/> >12 months <input type="checkbox"/> Not sure                                                                                                                                                                                                                                                                                               |
| Constipation                                          | <input type="checkbox"/> Yes <input type="checkbox"/> No | <b>If yes, what was the time of onset</b><br><input type="checkbox"/> < 1 month <input type="checkbox"/> 1-2 months <input type="checkbox"/> >2 -3 months <input type="checkbox"/> >3-4 months <input type="checkbox"/> >4-5 months<br><input type="checkbox"/> >5-6 months <input type="checkbox"/> >6-7 months <input type="checkbox"/> >7 -8 months <input type="checkbox"/> >8-9 months <input type="checkbox"/> >9 -10 months<br><input type="checkbox"/> >10-11 months <input type="checkbox"/> >11 -12 months <input type="checkbox"/> >12 months <input type="checkbox"/> From the time of discharge<br><input type="checkbox"/> Not sure |
|                                                       |                                                          | <b>If yes, what was the duration of symptoms</b><br><input type="checkbox"/> < 1 month <input type="checkbox"/> 1-2 months <input type="checkbox"/> >2 -3 months <input type="checkbox"/> >3-4 months <input type="checkbox"/> >4-5 months<br><input type="checkbox"/> >5-6 months <input type="checkbox"/> >6-7 months <input type="checkbox"/> >7 -8 months <input type="checkbox"/> >8-9 months <input type="checkbox"/> >9 -10 months<br><input type="checkbox"/> >10-11 months <input type="checkbox"/> >11 -12 months <input type="checkbox"/> >12 months <input type="checkbox"/> Not sure                                                 |
| <b>Cardiovascular problems</b>                        | <b>Tick Yes or No</b>                                    | <b>If yes, what was the time of onset</b>                                                                                                                                                                                                                                                                                                                                                                                                                                                                                                                                                                                                         |
| Palpitations (heart racing)                           | <input type="checkbox"/> Yes <input type="checkbox"/> No | <input type="checkbox"/> < 1 month <input type="checkbox"/> 1-2 months <input type="checkbox"/> >2 -3 months <input type="checkbox"/> >3-4 months <input type="checkbox"/> >4-5 months<br><input type="checkbox"/> >5-6 months <input type="checkbox"/> >6-7 months <input type="checkbox"/> >7 -8 months <input type="checkbox"/> >8-9 months <input type="checkbox"/> >9 -10 months<br><input type="checkbox"/> >10-11 months <input type="checkbox"/> >11 -12 months <input type="checkbox"/> >12 months <input type="checkbox"/> From the time of discharge<br><input type="checkbox"/> Not sure                                              |
|                                                       |                                                          | <b>If yes, what was the duration of symptoms</b><br><input type="checkbox"/> < 1 month <input type="checkbox"/> 1-2 months <input type="checkbox"/> >2 -3 months <input type="checkbox"/> >3-4 months <input type="checkbox"/> >4-5 months<br><input type="checkbox"/> >5-6 months <input type="checkbox"/> >6-7 months <input type="checkbox"/> >7 -8 months <input type="checkbox"/> >8-9 months <input type="checkbox"/> >9 -10 months<br><input type="checkbox"/> >10-11 months <input type="checkbox"/> >11 -12 months <input type="checkbox"/> >12 months <input type="checkbox"/> Not sure                                                 |
| Variations in heart rate (tachycardia or bradycardia) | <input type="checkbox"/> Yes <input type="checkbox"/> No | <b>If yes, what was the time of onset</b><br><input type="checkbox"/> < 1 month <input type="checkbox"/> 1-2 months <input type="checkbox"/> >2 -3 months <input type="checkbox"/> >3-4 months <input type="checkbox"/> >4-5 months<br><input type="checkbox"/> >5-6 months <input type="checkbox"/> >6-7 months <input type="checkbox"/> >7 -8 months <input type="checkbox"/> >8-9 months <input type="checkbox"/> >9 -10 months<br><input type="checkbox"/> >10-11 months <input type="checkbox"/> >11 -12 months <input type="checkbox"/> >12 months <input type="checkbox"/> From the time of discharge<br><input type="checkbox"/> Not sure |
|                                                       |                                                          | <b>If yes, what was the duration of symptoms</b><br><input type="checkbox"/> < 1 month <input type="checkbox"/> 1-2 months <input type="checkbox"/> >2 -3 months <input type="checkbox"/> >3-4 months <input type="checkbox"/> >4-5 months<br><input type="checkbox"/> >5-6 months <input type="checkbox"/> >6-7 months <input type="checkbox"/> >7 -8 months <input type="checkbox"/> >8-9 months <input type="checkbox"/> >9 -10 months<br><input type="checkbox"/> >10-11 months <input type="checkbox"/> >11 -12 months <input type="checkbox"/> >12 months <input type="checkbox"/> Not sure                                                 |
| Bleeding                                              | <input type="checkbox"/> Yes <input type="checkbox"/> No | <b>If yes, what was the time of onset</b><br><input type="checkbox"/> < 1 month <input type="checkbox"/> 1-2 months <input type="checkbox"/> >2 -3 months <input type="checkbox"/> >3-4 months <input type="checkbox"/> >4-5 months<br><input type="checkbox"/> >5-6 months <input type="checkbox"/> >6-7 months <input type="checkbox"/> >7 -8 months <input type="checkbox"/> >8-9 months <input type="checkbox"/> >9 -10 months<br><input type="checkbox"/> >10-11 months <input type="checkbox"/> >11 -12 months <input type="checkbox"/> >12 months <input type="checkbox"/> From the time of discharge<br><input type="checkbox"/> Not sure |
|                                                       |                                                          | <b>If yes, what was the duration of symptoms</b><br><input type="checkbox"/> < 1 month <input type="checkbox"/> 1-2 months <input type="checkbox"/> >2 -3 months <input type="checkbox"/> >3-4 months <input type="checkbox"/> >4-5 months<br><input type="checkbox"/> >5-6 months <input type="checkbox"/> >6-7 months <input type="checkbox"/> >7 -8 months <input type="checkbox"/> >8-9 months <input type="checkbox"/> >9 -10 months<br><input type="checkbox"/> >10-11 months <input type="checkbox"/> >11 -12 months <input type="checkbox"/> >12 months <input type="checkbox"/> Not sure                                                 |
| <i>If yes, specify bleeding site:</i>                 |                                                          |                                                                                                                                                                                                                                                                                                                                                                                                                                                                                                                                                                                                                                                   |
| <b>Genitourinary problems</b>                         | <b>Tick Yes or No</b>                                    | <b>If yes, what was the time of onset</b>                                                                                                                                                                                                                                                                                                                                                                                                                                                                                                                                                                                                         |

|                                                                                                                    |                                                                                                     |                                                                                                                                                                                                                                                                                                                                                                                                                                                                                                                                                                                                                                                                                                                                                                                                                                                                                                                                                                                                                                                                                                                                                                                                                                                        |
|--------------------------------------------------------------------------------------------------------------------|-----------------------------------------------------------------------------------------------------|--------------------------------------------------------------------------------------------------------------------------------------------------------------------------------------------------------------------------------------------------------------------------------------------------------------------------------------------------------------------------------------------------------------------------------------------------------------------------------------------------------------------------------------------------------------------------------------------------------------------------------------------------------------------------------------------------------------------------------------------------------------------------------------------------------------------------------------------------------------------------------------------------------------------------------------------------------------------------------------------------------------------------------------------------------------------------------------------------------------------------------------------------------------------------------------------------------------------------------------------------------|
| Urination problems                                                                                                 | <input type="checkbox"/> Yes <input type="checkbox"/> No                                            | <input type="checkbox"/> < 1 month <input type="checkbox"/> 1-2 months <input type="checkbox"/> >2 -3 months <input type="checkbox"/> >3-4 months <input type="checkbox"/> >4-5 months<br><input type="checkbox"/> >5-6 months <input type="checkbox"/> >6-7 months <input type="checkbox"/> >7 -8 months <input type="checkbox"/> >8-9 months <input type="checkbox"/> >9 -10 months<br><input type="checkbox"/> >10-11 months <input type="checkbox"/> >11 -12 months <input type="checkbox"/> >12 months <input type="checkbox"/> From the time of discharge<br><input type="checkbox"/> Not sure<br><b>If yes, what was the duration of symptoms</b><br><input type="checkbox"/> < 1 month <input type="checkbox"/> 1-2 months <input type="checkbox"/> >2 -3 months <input type="checkbox"/> >3-4 months <input type="checkbox"/> >4-5 months<br><input type="checkbox"/> >5-6 months <input type="checkbox"/> >6-7 months <input type="checkbox"/> >7 -8 months <input type="checkbox"/> >8-9 months <input type="checkbox"/> >9 -10 months<br><input type="checkbox"/> >10-11 months <input type="checkbox"/> >11 -12 months <input type="checkbox"/> >12 months <input type="checkbox"/> Not sure                                              |
| Changes in menstruation, (if regular before Covid-19 illness)                                                      | <input type="checkbox"/> Yes <input type="checkbox"/> No<br><input type="checkbox"/> Not applicable | <b>If yes, what was the time of onset</b><br><input type="checkbox"/> < 1 month <input type="checkbox"/> 1-2 months <input type="checkbox"/> >2 -3 months <input type="checkbox"/> >3-4 months <input type="checkbox"/> >4-5 months<br><input type="checkbox"/> >5-6 months <input type="checkbox"/> >6-7 months <input type="checkbox"/> >7 -8 months <input type="checkbox"/> >8-9 months <input type="checkbox"/> >9 -10 months<br><input type="checkbox"/> >10-11 months <input type="checkbox"/> >11 -12 months <input type="checkbox"/> >12 months <input type="checkbox"/> From the time of discharge<br><input type="checkbox"/> Not sure<br><b>If yes, what was the duration of symptoms</b><br><input type="checkbox"/> < 1 month <input type="checkbox"/> 1-2 months <input type="checkbox"/> >2 -3 months <input type="checkbox"/> >3-4 months <input type="checkbox"/> >4-5 months<br><input type="checkbox"/> >5-6 months <input type="checkbox"/> >6-7 months <input type="checkbox"/> >7 -8 months <input type="checkbox"/> >8-9 months <input type="checkbox"/> >9 -10 months<br><input type="checkbox"/> >10-11 months <input type="checkbox"/> >11 -12 months <input type="checkbox"/> >12 months <input type="checkbox"/> Not sure |
| <b>Other problems</b>                                                                                              | <b>Tick Yes or No</b>                                                                               | <b>If yes, what was the time of onset</b>                                                                                                                                                                                                                                                                                                                                                                                                                                                                                                                                                                                                                                                                                                                                                                                                                                                                                                                                                                                                                                                                                                                                                                                                              |
| Bilateral conjunctivitis<br><i>If yes, <input type="checkbox"/> purulent <input type="checkbox"/> non-purulent</i> | <input type="checkbox"/> Yes <input type="checkbox"/> No                                            | <input type="checkbox"/> < 1 month <input type="checkbox"/> 1-2 months <input type="checkbox"/> >2 -3 months <input type="checkbox"/> >3-4 months <input type="checkbox"/> >4-5 months<br><input type="checkbox"/> >5-6 months <input type="checkbox"/> >6-7 months <input type="checkbox"/> >7 -8 months <input type="checkbox"/> >8-9 months <input type="checkbox"/> >9 -10 months<br><input type="checkbox"/> >10-11 months <input type="checkbox"/> >11 -12 months <input type="checkbox"/> >12 months <input type="checkbox"/> From the time of discharge<br><input type="checkbox"/> Not sure<br><b>If yes, what was the duration of symptoms</b><br><input type="checkbox"/> < 1 month <input type="checkbox"/> 1-2 months <input type="checkbox"/> >2 -3 months <input type="checkbox"/> >3-4 months <input type="checkbox"/> >4-5 months<br><input type="checkbox"/> >5-6 months <input type="checkbox"/> >6-7 months <input type="checkbox"/> >7 -8 months <input type="checkbox"/> >8-9 months <input type="checkbox"/> >9 -10 months<br><input type="checkbox"/> >10-11 months <input type="checkbox"/> >11 -12 months <input type="checkbox"/> >12 months <input type="checkbox"/> Not sure                                              |
| Lumps or rashes (purple/pink) on toes                                                                              | <input type="checkbox"/> Yes <input type="checkbox"/> No                                            | <b>If yes, what was the time of onset</b><br><input type="checkbox"/> < 1 month <input type="checkbox"/> 1-2 months <input type="checkbox"/> >2 -3 months <input type="checkbox"/> >3-4 months <input type="checkbox"/> >4-5 months<br><input type="checkbox"/> >5-6 months <input type="checkbox"/> >6-7 months <input type="checkbox"/> >7 -8 months <input type="checkbox"/> >8-9 months <input type="checkbox"/> >9 -10 months<br><input type="checkbox"/> >10-11 months <input type="checkbox"/> >11 -12 months <input type="checkbox"/> >12 months <input type="checkbox"/> From the time of discharge<br><input type="checkbox"/> Not sure<br><b>If yes, what was the duration of symptoms</b><br><input type="checkbox"/> < 1 month <input type="checkbox"/> 1-2 months <input type="checkbox"/> >2 -3 months <input type="checkbox"/> >3-4 months <input type="checkbox"/> >4-5 months<br><input type="checkbox"/> >5-6 months <input type="checkbox"/> >6-7 months <input type="checkbox"/> >7 -8 months <input type="checkbox"/> >8-9 months <input type="checkbox"/> >9 -10 months<br><input type="checkbox"/> >10-11 months <input type="checkbox"/> >11 -12 months <input type="checkbox"/> >12 months <input type="checkbox"/> Not sure |
| Skin rash                                                                                                          | <input type="checkbox"/> Yes <input type="checkbox"/> No                                            | <b>If yes, what was the time of onset</b><br><input type="checkbox"/> < 1 month <input type="checkbox"/> 1-2 months <input type="checkbox"/> >2 -3 months <input type="checkbox"/> >3-4 months <input type="checkbox"/> >4-5 months<br><input type="checkbox"/> >5-6 months <input type="checkbox"/> >6-7 months <input type="checkbox"/> >7 -8 months <input type="checkbox"/> >8-9 months <input type="checkbox"/> >9 -10 months<br><input type="checkbox"/> >10-11 months <input type="checkbox"/> >11 -12 months <input type="checkbox"/> >12 months <input type="checkbox"/> From the time of discharge<br><input type="checkbox"/> Not sure<br><b>If yes, what was the duration of symptoms</b><br><input type="checkbox"/> < 1 month <input type="checkbox"/> 1-2 months <input type="checkbox"/> >2 -3 months <input type="checkbox"/> >3-4 months <input type="checkbox"/> >4-5 months                                                                                                                                                                                                                                                                                                                                                        |

|                                                                               |                                                          |                                                                                                                                                                                                                                                                                                                                                                                                                                                                                                                                                                                                      |
|-------------------------------------------------------------------------------|----------------------------------------------------------|------------------------------------------------------------------------------------------------------------------------------------------------------------------------------------------------------------------------------------------------------------------------------------------------------------------------------------------------------------------------------------------------------------------------------------------------------------------------------------------------------------------------------------------------------------------------------------------------------|
|                                                                               |                                                          | <input type="checkbox"/> >5-6 months <input type="checkbox"/> >6-7 months <input type="checkbox"/> >7 -8 months <input type="checkbox"/> >8-9 months <input type="checkbox"/> >9 -10 months<br><input type="checkbox"/> >10-11 months <input type="checkbox"/> >11 -12 months <input type="checkbox"/> >12 months <input type="checkbox"/> Not sure                                                                                                                                                                                                                                                  |
| Skin rash <i>If yes, tick all body areas that apply:</i>                      | <input type="checkbox"/> Yes <input type="checkbox"/> No | <input type="checkbox"/> <i>Face</i>                                                                                                                                                                                                                                                                                                                                                                                                                                                                                                                                                                 |
|                                                                               |                                                          | <input type="checkbox"/> <i>Trunk (stomach or back)</i>                                                                                                                                                                                                                                                                                                                                                                                                                                                                                                                                              |
|                                                                               |                                                          | <input type="checkbox"/> <i>Arms</i>                                                                                                                                                                                                                                                                                                                                                                                                                                                                                                                                                                 |
|                                                                               |                                                          | <input type="checkbox"/> <i>Legs</i>                                                                                                                                                                                                                                                                                                                                                                                                                                                                                                                                                                 |
|                                                                               |                                                          | <input type="checkbox"/> <i>Buttocks</i>                                                                                                                                                                                                                                                                                                                                                                                                                                                                                                                                                             |
|                                                                               |                                                          | <input type="checkbox"/> <i>Toes</i>                                                                                                                                                                                                                                                                                                                                                                                                                                                                                                                                                                 |
|                                                                               |                                                          | <input type="checkbox"/> <i>Fingers</i>                                                                                                                                                                                                                                                                                                                                                                                                                                                                                                                                                              |
|                                                                               |                                                          | <input type="checkbox"/> <i>Accompanied by itch</i>                                                                                                                                                                                                                                                                                                                                                                                                                                                                                                                                                  |
| Hair loss                                                                     | <input type="checkbox"/> Yes <input type="checkbox"/> No | <b>If yes, what was the time of onset</b>                                                                                                                                                                                                                                                                                                                                                                                                                                                                                                                                                            |
|                                                                               |                                                          | <input type="checkbox"/> < 1 month <input type="checkbox"/> 1-2 months <input type="checkbox"/> >2 -3 months <input type="checkbox"/> >3-4 months <input type="checkbox"/> >4-5 months<br><input type="checkbox"/> >5-6 months <input type="checkbox"/> >6-7 months <input type="checkbox"/> >7 -8 months <input type="checkbox"/> >8-9 months <input type="checkbox"/> >9 -10 months<br><input type="checkbox"/> >10-11 months <input type="checkbox"/> >11 -12 months <input type="checkbox"/> >12 months <input type="checkbox"/> From the time of discharge<br><input type="checkbox"/> Not sure |
|                                                                               |                                                          | <b>If yes, what was the duration of symptoms</b>                                                                                                                                                                                                                                                                                                                                                                                                                                                                                                                                                     |
|                                                                               |                                                          | <input type="checkbox"/> < 1 month <input type="checkbox"/> 1-2 months <input type="checkbox"/> >2 -3 months <input type="checkbox"/> >3-4 months <input type="checkbox"/> >4-5 months<br><input type="checkbox"/> >5-6 months <input type="checkbox"/> >6-7 months <input type="checkbox"/> >7 -8 months <input type="checkbox"/> >8-9 months <input type="checkbox"/> >9 -10 months<br><input type="checkbox"/> >10-11 months <input type="checkbox"/> >11 -12 months <input type="checkbox"/> >12 months <input type="checkbox"/> Not sure                                                        |
| Hyperhidrosis                                                                 | <input type="checkbox"/> Yes <input type="checkbox"/> No | <b>If yes, what was the time of onset</b>                                                                                                                                                                                                                                                                                                                                                                                                                                                                                                                                                            |
|                                                                               |                                                          | <input type="checkbox"/> < 1 month <input type="checkbox"/> 1-2 months <input type="checkbox"/> >2 -3 months <input type="checkbox"/> >3-4 months <input type="checkbox"/> >4-5 months<br><input type="checkbox"/> >5-6 months <input type="checkbox"/> >6-7 months <input type="checkbox"/> >7 -8 months <input type="checkbox"/> >8-9 months <input type="checkbox"/> >9 -10 months<br><input type="checkbox"/> >10-11 months <input type="checkbox"/> >11 -12 months <input type="checkbox"/> >12 months <input type="checkbox"/> From the time of discharge<br><input type="checkbox"/> Not sure |
|                                                                               |                                                          | <b>If yes, what was the duration of symptoms</b>                                                                                                                                                                                                                                                                                                                                                                                                                                                                                                                                                     |
|                                                                               |                                                          | <input type="checkbox"/> < 1 month <input type="checkbox"/> 1-2 months <input type="checkbox"/> >2 -3 months <input type="checkbox"/> >3-4 months <input type="checkbox"/> >4-5 months<br><input type="checkbox"/> >5-6 months <input type="checkbox"/> >6-7 months <input type="checkbox"/> >7 -8 months <input type="checkbox"/> >8-9 months <input type="checkbox"/> >9 -10 months<br><input type="checkbox"/> >10-11 months <input type="checkbox"/> >11 -12 months <input type="checkbox"/> >12 months <input type="checkbox"/> Not sure                                                        |
| <b>Other New Symptoms, if yes, specify all with their onset and duration:</b> |                                                          | <b>If yes, what was the time of onset</b>                                                                                                                                                                                                                                                                                                                                                                                                                                                                                                                                                            |
|                                                                               |                                                          | <input type="checkbox"/> < 1 month <input type="checkbox"/> 1-2 months <input type="checkbox"/> >2 -3 months <input type="checkbox"/> >3-4 months <input type="checkbox"/> >4-5 months<br><input type="checkbox"/> >5-6 months <input type="checkbox"/> >6-7 months <input type="checkbox"/> >7 -8 months <input type="checkbox"/> >8-9 months <input type="checkbox"/> >9 -10 months<br><input type="checkbox"/> >10-11 months <input type="checkbox"/> >11 -12 months <input type="checkbox"/> >12 months <input type="checkbox"/> From the time of discharge<br><input type="checkbox"/> Not sure |
|                                                                               |                                                          | <b>If yes, what was the duration of symptoms</b>                                                                                                                                                                                                                                                                                                                                                                                                                                                                                                                                                     |
|                                                                               |                                                          | <input type="checkbox"/> < 1 month <input type="checkbox"/> 1-2 months <input type="checkbox"/> >2 -3 months <input type="checkbox"/> >3-4 months <input type="checkbox"/> >4-5 months<br><input type="checkbox"/> >5-6 months <input type="checkbox"/> >6-7 months <input type="checkbox"/> >7 -8 months <input type="checkbox"/> >8-9 months <input type="checkbox"/> >9 -10 months<br><input type="checkbox"/> >10-11 months <input type="checkbox"/> >11 -12 months <input type="checkbox"/> >12 months <input type="checkbox"/> Not sure                                                        |

**7. Your child's overall health status**

We would like to know how good or bad your child's health was **BEFORE Covid-19** and how it is **TODAY**

This scale is numbered from 0 to 100% with **100% meaning the best health** you can imagine **0% means the worst health** you can imagine.

Please indicate on the scale and **write the number in the box below each scale** to indicate how good or bad your child's health was **BEFORE Covid-19** and how it is **TODAY**.

| Best health            | Best health          |
|------------------------|----------------------|
| 100                    | 100                  |
| 95                     | 95                   |
| 90                     | 90                   |
| 85                     | 85                   |
| 80                     | 80                   |
| 75                     | 75                   |
| 70                     | 70                   |
| 65                     | 65                   |
| 60                     | 60                   |
| 55                     | 55                   |
| 50                     | 50                   |
| 45                     | 45                   |
| 40                     | 40                   |
| 35                     | 35                   |
| 30                     | 30                   |
| 25                     | 25                   |
| 20                     | 20                   |
| 15                     | 15                   |
| 10                     | 10                   |
| 5                      | 5                    |
| 0                      | 0                    |
| <b>Before Covid-19</b> | <b>Today</b>         |
| <input type="text"/>   | <input type="text"/> |

## 8. Vaccinations

**Has your child been vaccinated in accordance with the national vaccination schedule?**

Yes, vaccinated up to date  Yes, but some vaccines were missed  No, I avoid vaccination for my child

**Please provide an approximate date of your child's latest vaccination?**

[\_D\_][\_D\_] / [\_M\_][\_M\_] / [\_2\_][\_0\_] [\_Y\_][\_Y\_]

Please, specify what was the vaccine: \_\_\_\_\_  I do not remember

**I trust information I receive about vaccines?**

Not at all  Only a little  Undecided  Quite a lot  A great deal

**How confident are you in any of the childhood vaccines safety?**

Not at all  Only a little  Undecided  Quite a lot  A great deal

**Has your child been vaccinated against Covid-19?**  Yes  No  Not sure

If yes, how many times have they had the Covid-19 vaccine? [\_Number\_]

Estimated date of the last vaccine dose received: [\_D\_][\_D\_] / [\_M\_][\_M\_] / [\_2\_][\_0\_] [\_2\_][\_Y\_]

Which type of Covid-19 vaccine did they receive:  AstraZeneca  Pfizer-BioNTech

Imperial  Janssens  Moderna's  Sinopharm  Sputnik V  Other (name): \_\_\_\_\_  Not sure

**If no, would you like to vaccinate your child against Covid-19 in the future?**  Yes  No  Not sure

**I trust information I receive about Covid-19 vaccination?**

Not at all  Only a little  Undecided  Quite a lot  A great deal

**How confident are you in the safety of Covid-19 vaccinations?**

Not at all  Only a little  Undecided  Quite a lot  A great deal

**What is your opinion of Russian-made vaccines against Covid-19?**

Negative  Neutral  Positive  Not sure

**What is your opinion of vaccines against Covid-19 produced abroad?**

Negative  Neutral  Positive  Not sure

## 9. Some questions about you

|                                                                                                                             |                                                          |
|-----------------------------------------------------------------------------------------------------------------------------|----------------------------------------------------------|
| During your child's illness, have you often been in a bad mood, depressed or feeling hopeless?                              | <input type="checkbox"/> Yes <input type="checkbox"/> No |
| During your child's illness, did you often feel that everything was difficult, and you did not want to do anything?         | <input type="checkbox"/> Yes <input type="checkbox"/> No |
| During your child's illness, did you often feel persistent fatigue for no reason?                                           | <input type="checkbox"/> Yes <input type="checkbox"/> No |
| Did your child's illness often make you feel nervous, anxious or extremely stressed?                                        | <input type="checkbox"/> Yes <input type="checkbox"/> No |
| Did your child's illness often leave you unable to calm down or have you often been unable to calm or control your worries? | <input type="checkbox"/> Yes <input type="checkbox"/> No |
| Due to your child's illness, have you often experienced fear, as if something terrible were about to happen?                | <input type="checkbox"/> Yes <input type="checkbox"/> No |
| Due to your child's illness, have you had to face aggressive or prejudiced attitudes from others?                           | <input type="checkbox"/> Yes <input type="checkbox"/> No |
| Did you receive enough help and support during your child's illness?                                                        | <input type="checkbox"/> Yes <input type="checkbox"/> No |

**10. Please let us know of any further comments about the child's illness, the pandemic, lockdown and/or any sequelae.**

**11. End of survey**

**Thank you for your time!**



**Table S1.** Categorisation of persistent symptoms at follow-up.

| Symptom category | Persistent symptoms included                                                                                                                                                                                                                                              |
|------------------|---------------------------------------------------------------------------------------------------------------------------------------------------------------------------------------------------------------------------------------------------------------------------|
| Musculoskeletal  | joint pain or swelling OR persistent muscle pain                                                                                                                                                                                                                          |
| Cardiovascular   | variations in heart rate OR palpitations                                                                                                                                                                                                                                  |
| Respiratory      | difficulty breathing/chest tightness OR pain on breathing OR persistent cough                                                                                                                                                                                             |
| Neurological     | cannot fully move or control movement OR problems with balance OR confusion/lack of concentration OR problems speaking or communicating OR seizures/fits OR tingling feeling/ 'pins and needles' OR tremor/shakiness OR dizziness/light headedness OR fainting/ blackouts |
| Dermatological   | skin rash OR lumps or rashes (purple/pink) on toes OR hair loss                                                                                                                                                                                                           |
| Gastrointestinal | constipation OR diarrhea OR feeling nauseous OR stomach/ abdominal pain OR vomiting                                                                                                                                                                                       |
| Sensory          | disturbed smell OR disturbed taste OR loss of smell OR loss of taste                                                                                                                                                                                                      |
| Sleep            | hypersomnia OR insomnia                                                                                                                                                                                                                                                   |
| Fatigue          | fatigue                                                                                                                                                                                                                                                                   |

**Table S2.** Symptoms at the time of hospital admission.

| Characteristics                  | Results         |
|----------------------------------|-----------------|
| History of fever                 | 427/511 (83.6%) |
| Cough                            | 284/510 (55.7%) |
| Fatigue                          | 197/506 (38.9%) |
| Rhinorrhoea                      | 278/512 (54.3%) |
| Shortness of breath              | 77/513 (15%)    |
| Disturbed smell or loss of smell | 64/456 (14%)    |
| Sore throat                      | 67/487 (13.8%)  |
| Lymphadenopathy                  | 52/512 (10.2%)  |
| Headache                         | 40/465 (8.6%)   |
| Diarrhoea                        | 43/511 (8.4%)   |
| Skin rash                        | 41/512 (8%)     |
| Wheezing                         | 39/512 (7.6%)   |
| Vomiting / Nausea                | 32/512 (6.2%)   |
| Chest pain                       | 28/464 (6%)     |
| Abdominal pain                   | 27/489 (5.5%)   |
| Disturbed taste or Loss of taste | 16/456 (3.5%)   |
| Muscle aches                     | 14/463 (3%)     |
| Conjunctivitis                   | 10/512 (2%)     |
| Joint pain                       | 5/461 (1.1%)    |
| Ear pain                         | 3/463 (0.6%)    |
| Seizures                         | 3/512 (0.6%)    |
| Bleeding                         | 3/512 (0.6%)    |
| Lower chest wall indrawing       | 3/512 (0.6%)    |
| Confusion                        | 2/511 (0.4%)    |

The differing denominators used indicate missing data.

**Table S3.** Most commonly used treatments during the hospital stay.

| <b>Characteristics</b>               | <b>Total</b>    |
|--------------------------------------|-----------------|
| Antiviral or COVID-19 targeted agent | 394/512 (77.0%) |
| Antibiotics                          | 380/513 (74.1%) |
| Mucolytics                           | 188/513 (36.7%) |
| Arbidol                              | 133/512 (26%)   |
| Antifungal agent                     | 25/513 (4.9%)   |
| Corticosteroid                       | 20/513 (3.9%)   |
| Heparin                              | 17/513 (3.3%)   |

The differing denominators used indicate missing data.

**Table S4.** Symptoms reported at the time of the follow-up interview and symptom duration (in months).

| Current symptom                 | Total number of patients with the symptom | Total number of patients with the persistent symptom | < 1             | 1-2           | > 2-3         | > 3-4        | > 4-5        | > 5-6         | > 6-7         | > 7-8         | > 8-9        | > 9-10     | From the time of discharge |
|---------------------------------|-------------------------------------------|------------------------------------------------------|-----------------|---------------|---------------|--------------|--------------|---------------|---------------|---------------|--------------|------------|----------------------------|
| Fatigue                         | 63/498 (12.65%)                           | 53/496 (10.69%)                                      | 5/496 (1.01%)   | 1/496 (0.2%)  | 0/496 (0%)    | 1/496 (0.2%) | 1/496 (0.2%) | 4/496 (0.81%) | 1/496 (0.2%)  | 2/496 (0.4%)  | 1/496 (0.2%) | 0/496 (0%) | 45/496 (9.07%)             |
| Nasal congestion/ rhinorrhea    | 43/505(8.51%)                             | 10/505 (1.98%)                                       | 29/505 (5.74 %) | 2/505 (0.4%)  | 1/505 (0.2 %) | 1/505 (0.2%) | 0/505 (0%)   | 0/505 (0%)    | 0/505 (0%)    | 0/505 (0%)    | 0/505 (0%)   | 0/505 (0%) | 10/505 (1.98 %)            |
| Insomnia                        | 32/501 (6.39%)                            | 26/501 (5.19%)                                       | 2/501 (0.4%)    | 2/501 (0.4%)  | 1/501 (0.2%)  | 0/501 (0%)   | 1/501 (0.2%) | 2/501 (0.4%)  | 1/501 (0.2%)  | 1/501 (0.2%)  | 0/501 (0%)   | 0/501 (0%) | 22/501 (4.39%)             |
| Disturbed smell                 | 26/468 (5.56%)                            | 22/467 (4.71%)                                       | 0/467 (0%)      | 2/467 (0.43%) | 1/467 (0.21%) | 0/467 (0%)   | 0/467 (0%)   | 3/467 (0.64%) | 0/467 (0%)    | 2/467 (0.43%) | 0/467 (0%)   | 0/467 (0%) | 17/467 (3.64%)             |
| Headache                        | 24/488(4.92%)                             | 17/486 (3.5%)                                        | 4/486 (0.82%)   | 0/486 (0%)    | 1/486 (0.21%) | 0/486 (0%)   | 0/486 (0%)   | 1/486 (0.21%) | 0/486 (0%)    | 0/486 (0%)    | 0/486 (0%)   | 0/486 (0%) | 16/486 (3.29%)             |
| Disturbed taste                 | 18/468 (3.85%)                            | 16/468 (3.42%)                                       | 0/468 (0%)      | 1/468 (0.21%) | 1/468 (0.21%) | 0/468 (0%)   | 0/468 (0%)   | 2/468 (0.43%) | 0/468 (0%)    | 2/468 (0.43%) | 0/468 (0%)   | 0/468 (0%) | 12/468 (2.56%)             |
| Hyperhidrosis                   | 17/502(3.39%)                             | 13/502 (2.59%)                                       | 1/502 (0.2%)    | 2/502 (0.4%)  | 0/502 (0%)    | 1/502 (0.2%) | 0/502 (0%)   | 0/502 (0%)    | 0/502 (0%)    | 1/502 (0.2%)  | 0/502 (0%)   | 0/502 (0%) | 12/502 (2.39%)             |
| Persistent cough                | 17/503 (3.38%)                            | 5/503 (0.99%)                                        | 9/503 (1.79%)   | 3/503 (0.6%)  | 0/503 (0%)    | 0/503 (0%)   | 0/503 (0%)   | 0/503 (0%)    | 0/503 (0%)    | 0/503 (0%)    | 0/503 (0%)   | 0/503 (0%) | 5/503 (0.99%)              |
| Hypersomnia                     | 16/501 (3.19%)                            | 15/501 (2.99%)                                       | 0/501 (0%)      | 0/501 (0%)    | 0/501 (0%)    | 1/501 (0.2%) | 0/501 (0%)   | 1/501 (0.2%)  | 1/501 (0.2%)  | 1/501 (0.2%)  | 1/501 (0.2%) | 0/501 (0%) | 11/501 (2.2%)              |
| Poor appetite                   | 15/500 (3%)                               | 12/500 (2.4%)                                        | 2/500 (0.4%)    | 0/500 (0%)    | 1/500 (0.2%)  | 0/500 (0%)   | 0/500 (0%)   | 1/500 (0.2%)  | 0/500 (0%)    | 1/500 (0.2%)  | 1/500 (0.2%) | 0/500 (0%) | 9/500 (1.8%)               |
| Skin rash                       | 13/497 (2.62%)                            | 8/497 (1.61%)                                        | 3/497 (0.6%)    | 0/497 (0%)    | 1/497 (0.2%)  | 0/497 (0%)   | 1/497 (0.2%) | 2/497 (0.4%)  | 0/497 (0%)    | 0/497 (0%)    | 0/497 (0%)   | 0/497 (0%) | 6/497 (1.21%)              |
| Diarrhea                        | 13/499 (2.61%)                            | 10/499 (2%)                                          | 1/499 (0.2%)    | 0/499 (0%)    | 1/499 (0.2%)  | 0/499 (0%)   | 1/499 (0.2%) | 0/499 (0%)    | 0/499 (0%)    | 1/499 (0.2%)  | 0/499 (0%)   | 0/499 (0%) | 9/499 (1.8%)               |
| Stomach/ abdominal pain         | 13/499 (2.61%)                            | 10/499 (2%)                                          | 1/499 (0.2%)    | 1/499 (0.2%)  | 1/499 (0.2%)  | 0/499 (0%)   | 0/499 (0%)   | 0/499 (0%)    | 0/499 (0%)    | 1/499 (0.2%)  | 0/499 (0%)   | 0/499 (0%) | 9/499 (1.8%)               |
| Problems seeing/ blurred vision | 12/480 (2.5%)                             | 10/479 (2.09%)                                       | 0/479 (0%)      | 0/479 (0%)    | 1/479 (0.21%) | 0/479 (0%)   | 0/479 (0%)   | 1/479 (0.21%) | 1/479 (0.21%) | 0/479 (0%)    | 0/479 (0%)   | 0/479 (0%) | 8/479 (1.67%)              |
| Hair loss                       | 12/501 (2.4%)                             | 9/501 (1.8%)                                         | 0/501 (0%)      | 1/501 (0.2%)  | 2/501 (0.4%)  | 0/501 (0%)   | 0/501 (0%)   | 1/501 (0.2%)  | 1/501 (0.2%)  | 1/501 (0.2%)  | 0/501 (0%)   | 0/501 (0%) | 6/501 (1.2%)               |
| Dizziness/ light headedness     | 10/486 (2.06%)                            | 5/484 (1.03%)                                        | 2/484 (0.41%)   | 1/484 (0.21%) | 0/484 (0%)    | 0/484 (0%)   | 0/484 (0%)   | 0/484 (0%)    | 0/484 (0%)    | 0/484 (0%)    | 0/484 (0%)   | 0/484 (0%) | 5/484 (1.03%)              |
| Joint pain or swelling          | 10/493 (2.03%)                            | 6/492 (1.22%)                                        | 1/492 (0.2%)    | 2/492 (0.41%) | 0/492 (0%)    | 0/492 (0%)   | 0/492 (0%)   | 0/492 (0%)    | 0/492 (0%)    | 1/492 (0.2%)  | 0/492 (0%)   | 0/492 (0%) | 5/492 (1.02%)              |
| Variations in heart rate        | 10/494 (2.02%)                            | 6/493 (1.22%)                                        | 0/493 (0%)      | 0/493 (0%)    | 1/493 (0.2%)  | 0/493 (0%)   | 0/493 (0%)   | 0/493 (0%)    | 0/493 (0%)    | 1/493 (0.2%)  | 0/493 (0%)   | 0/493 (0%) | 5/493 (1.01%)              |
| Constipation                    | 9/500 (1.8%)                              | 8/500 (1.6%)                                         | 0/500 (0%)      | 0/500 (0%)    | 0/500 (0%)    | 1/500 (0.2%) | 0/500 (0%)   | 0/500 (0%)    | 0/500 (0%)    | 0/500 (0%)    | 0/500 (0%)   | 0/500 (0%) | 8/500 (1.6%)               |
| Loss of smell                   | 8/468 (1.71%)                             | 7/468 (1.5%)                                         | 0/468 (0%)      | 1/468 (0.21%) | 0/468 (0%)    | 0/468 (0%)   | 0/468 (0%)   | 0/468 (0%)    | 0/468 (0%)    | 0/468 (0%)    | 0/468 (0%)   | 0/468 (0%) | 7/468 (1.5%)               |

|                                       |               |               |               |               |               |              |               |               |              |               |               |              |              |               |
|---------------------------------------|---------------|---------------|---------------|---------------|---------------|--------------|---------------|---------------|--------------|---------------|---------------|--------------|--------------|---------------|
| Difficulty breathing /chest tightness | 8/503 (1.59%) | 7/503 (1.39%) | 1/503 (0.2%)  | 0/503 (0%)    | 0/503 (0%)    | 0/503 (0%)   | 0/503 (0%)    | 0/503 (0%)    | 1/503 (0.2%) | 0/503 (0%)    | 0/503 (0%)    | 0/503 (0%)   | 0/503 (0%)   | 6/503 (1.19%) |
| Palpitations                          | 7/472(1.48%)  | 5/471 (1.06%) | 0/471 (0%)    | 0/471 (0%)    | 1/471 (0.21%) | 0/471 (0%)   | 0/471 (0%)    | 0/471 (0%)    | 0/471 (0%)   | 0/471 (0%)    | 1/471 (0.21%) | 0/471 (0%)   | 0/471 (0%)   | 4/471 (0.85%) |
| Feeling nauseous                      | 7/500 (1.4%)  | 6/500 (1.2%)  | 1/500 (0.2%)  | 0/500 (0%)    | 0/500 (0%)    | 0/500 (0%)   | 0/500 (0%)    | 0/500 (0%)    | 0/500 (0%)   | 1/500 (0.2%)  | 1/500 (0.2%)  | 0/500 (0%)   | 0/500 (0%)   | 4/500 (0.8%)  |
| Chest pain                            | 6/487(1.23%)  | 3/487 (0.62%) | 2/487 (0.41%) | 0/487 (0%)    | 1/487 (0.21%) | 0/487 (0%)   | 0/487 (0%)    | 0/487 (0%)    | 0/487 (0%)   | 0/487 (0%)    | 0/487 (0%)    | 0/487 (0%)   | 0/487 (0%)   | 3/487 (0.62%) |
| Persistent muscle pain                | 6/491(1.22%)  | 4/490 (0.82%) | 1/490 (0.2%)  | 0/490 (0%)    | 0/490 (0%)    | 0/490 (0%)   | 0/490 (0%)    | 0/490 (0%)    | 0/490 (0%)   | 0/490 (0%)    | 1/490 (0.2%)  | 0/490 (0%)   | 0/490 (0%)   | 3/490 (0.61%) |
| Problems with balance                 | 6/496(1.21%)  | 2/494 (0.4%)  | 1/494 (0.2%)  | 1/494 (0.2%)  | 0/494 (0%)    | 0/494 (0%)   | 0/494 (0%)    | 0/494 (0%)    | 0/494 (0%)   | 0/494 (0%)    | 0/494 (0%)    | 0/494 (0%)   | 0/494 (0%)   | 2/494 (0.4%)  |
| Urination problems                    | 4/496 (0.81%) | 3/496 (0.6%)  | 1/496 (0.2%)  | 0/496 (0%)    | 0/496 (0%)    | 0/496 (0%)   | 0/496 (0%)    | 0/496 (0%)    | 0/496 (0%)   | 0/496 (0%)    | 0/496 (0%)    | 0/496 (0%)   | 1/496 (0.2%) | 2/496 (0.4%)  |
| Vomiting                              | 4/500 (0.8%)  | 4/500 (0.8%)  | 0/500 (0%)    | 0/500 (0%)    | 0/500 (0%)    | 0/500 (0%)   | 0/500 (0%)    | 0/500 (0%)    | 0/500 (0%)   | 0/500 (0%)    | 0/500 (0%)    | 1/500 (0.2%) | 0/500 (0%)   | 3/500 (0.6%)  |
| Confusion/ lack of concentration      | 3/486 (0.62%) | 2/486 (0.41%) | 0/486 (0%)    | 0/486 (0%)    | 0/486 (0%)    | 0/486 (0%)   | 1/486 (0.21%) | 1/486 (0.21%) | 0/486 (0%)   | 0/486 (0%)    | 0/486 (0%)    | 0/486 (0%)   | 0/486 (0%)   | 1/486 (0.21%) |
| Pain on breathing                     | 3/488(0.61%)  | 2/488 (0.41%) | 0/488 (0%)    | 0/488 (0%)    | 1/488 (0.2%)  | 0/488 (0%)   | 0/488 (0%)    | 0/488 (0%)    | 0/488 (0%)   | 0/488 (0%)    | 0/488 (0%)    | 0/488 (0%)   | 0/488 (0%)   | 2/488 (0.41%) |
| Cannot fully move or control movement | 3/499(0.6%)   | 2/499 (0.4%)  | 0/499 (0%)    | 1/499 (0.2%)  | 0/499 (0%)    | 0/499 (0%)   | 0/499 (0%)    | 0/499 (0%)    | 0/499 (0%)   | 0/499 (0%)    | 0/499 (0%)    | 0/499 (0%)   | 0/499 (0%)   | 2/499 (0.4%)  |
| Tremor/ shakiness                     | 3/500 (0.6%)  | 3/500 (0.6%)  | 0/500 (0%)    | 0/500 (0%)    | 0/500 (0%)    | 0/500 (0%)   | 0/500 (0%)    | 0/500 (0%)    | 0/500 (0%)   | 0/500 (0%)    | 0/500 (0%)    | 0/500 (0%)   | 0/500 (0%)   | 3/500 (0.6%)  |
| Bleeding                              | 3/497 (0.6%)  | 1/497 (0.2%)  | 0/497 (0%)    | 1/497 (0.2%)  | 1/497 (0.2%)  | 0/497 (0%)   | 0/497 (0%)    | 0/497 (0%)    | 0/497 (0%)   | 0/497 (0%)    | 0/497 (0%)    | 0/497 (0%)   | 0/497 (0%)   | 1/497 (0.2%)  |
| Changes in menstruation               | 3/501 (0.6%)  | 3/501 (0.6%)  | 0/501 (0%)    | 0/501 (0%)    | 0/501 (0%)    | 0/501 (0%)   | 0/501 (0%)    | 0/501 (0%)    | 0/501 (0%)   | 1/501 (0.2%)  | 0/501 (0%)    | 0/501 (0%)   | 0/501 (0%)   | 2/501 (0.4%)  |
| Loss of taste                         | 2/469(0.43%)  | 2/469 (0.43%) | 0/469 (0%)    | 0/469 (0%)    | 0/469 (0%)    | 0/469 (0%)   | 0/469 (0%)    | 0/469 (0%)    | 0/469 (0%)   | 0/469 (0%)    | 0/469 (0%)    | 0/469 (0%)   | 0/469 (0%)   | 2/469 (0.43%) |
| Tingling feeling/ “pins and needles“  | 2/472 (0.42%) | 2/472 (0.42%) | 0/472 (0%)    | 1/472 (0.21%) | 0/472 (0%)    | 0/472 (0%)   | 0/472 (0%)    | 0/472 (0%)    | 0/472 (0%)   | 1/472 (0.21%) | 0/472 (0%)    | 0/472 (0%)   | 0/472 (0%)   | 0/472 (0%)    |
| Weight loss                           | 2/500 (0.4%)  | 0/500 (0%)    | 0/500 (0%)    | 0/500 (0%)    | 0/500 (0%)    | 0/500 (0%)   | 1/500 (0.2%)  | 0/500 (0%)    | 0/500 (0%)   | 0/500 (0%)    | 0/500 (0%)    | 0/500 (0%)   | 0/500 (0%)   | 0/500 (0%)    |
| Problems swallowing or chewing        | 2/499 (0.4%)  | 1/499 (0.2%)  | 1/499 (0.2%)  | 0/499 (0%)    | 0/499 (0%)    | 0/499 (0%)   | 0/499 (0%)    | 0/499 (0%)    | 0/499 (0%)   | 0/499 (0%)    | 0/499 (0%)    | 0/499 (0%)   | 0/499 (0%)   | 1/499 (0.2%)  |
| Bilateral conjunctivitis              | 2/496 (0.4%)  | 2/496 (0.4%)  | 0/496 (0%)    | 0/496 (0%)    | 0/496 (0%)    | 0/496 (0%)   | 0/496 (0%)    | 0/496 (0%)    | 0/496 (0%)   | 0/496 (0%)    | 0/496 (0%)    | 0/496 (0%)   | 0/496 (0%)   | 2/496 (0.4%)  |
| Seizures/fits                         | 1/498 (0.2%)  | 0/498 (0%)    | 0/498 (NaN%)  | 0/498 (NaN%)  | 0/498 (NaN%)  | 0/498 (NaN%) | 0/498 (NaN%)  | 0/498 (NaN%)  | 0/498 (NaN%) | 0/498 (NaN%)  | 0/498 (NaN%)  | 0/498 (NaN%) | 0/498 (NaN%) | 0/498 (NaN%)  |
| Lumps or rashes                       | 1/495 (0.2%)  | 1/495 (0.2%)  | 0/495 (0%)    | 0/495 (0%)    | 0/495 (0%)    | 0/495 (0%)   | 0/495 (0%)    | 0/495 (0%)    | 0/495 (0%)   | 0/495 (0%)    | 0/495 (0%)    | 0/495 (0%)   | 0/495 (0%)   | 1/495 (0.2%)  |

|                                    |              |              |              |              |              |              |              |              |              |              |              |              |
|------------------------------------|--------------|--------------|--------------|--------------|--------------|--------------|--------------|--------------|--------------|--------------|--------------|--------------|
| (purple/pink) on toes              | (0%)         | (0%)         | (0%)         | (0%)         | (0%)         | (0%)         | (0%)         | (0%)         | (0%)         | (0%)         | (0%)         | (0%)         |
| Problems speaking or communicating | 1/489 (0.2%) | 1/489 (0.2%) | 0/489 (0%)   | 0/489 (0%)   | 0/489 (0%)   | 0/489 (0%)   | 0/489 (0%)   | 0/489 (0%)   | 0/489 (0%)   | 0/489 (0%)   | 0/489 (0%)   | 0/489 (0.2%) |
| Fainting/blackouts                 | 0/497 (0%)   | 0/497 (0%)   | 0/497 (NaN%) | 0/497 (NaN%) | 0/497 (NaN%) | 0/497 (NaN%) | 0/497 (NaN%) | 0/497 (NaN%) | 0/497 (NaN%) | 0/497 (NaN%) | 0/497 (NaN%) | 0/497 (NaN%) |

The differing denominators used indicate missing data.

**Table S4.** Parental perception of mood and behaviour changes in their children.

| Characteristic                                                                                                                         | Likert scale response |            |              |           |            |             |           | Reasons of changes |                   |            |            |
|----------------------------------------------------------------------------------------------------------------------------------------|-----------------------|------------|--------------|-----------|------------|-------------|-----------|--------------------|-------------------|------------|------------|
|                                                                                                                                        | 1 (less)              | 2          | 3 (the same) | 4         | 5 (more)   | Not known   | Other     | Illness itself     | Covid-19 pandemic | Both       | Unsure     |
| Eating                                                                                                                                 | 14 (2.7%)             | 23 (4.5%)  | 445 (86.4%)  | 9 (1.7%)  | 10 (1.9%)  | 3 (0.6%)    | 11 (2.1%) | 28 (49.1%)         | 4 (7%)            | 2 (3.5%)   | 23 (40.4%) |
| Sleeping                                                                                                                               | 15 (2.9%)             | 23 (4.5%)  | 447 (86.8%)  | 5 (1%)    | 11 (2.1%)  | 4 (0.8%)    | 10 (1.9%) | 28 (52.8%)         | 7 (13.2%)         | 4 (7.5%)   | 14 (26.4%) |
| Physical activity                                                                                                                      | 27 (5.2%)             | 33 (6.4%)  | 429 (83.3%)  | 9 (1.7%)  | 4 (0.8%)   | 3 (0.6%)    | 10 (1.9%) | 26 (37.7%)         | 22 (31.9%)        | 5 (7.2%)   | 16 (23.2%) |
| Fatigue                                                                                                                                | 3 (0.6%)              | 11 (2.1%)  | 400 (77.8%)  | 39 (7.6%) | 48 (9.3%)  | 4 (0.8%)    | 9 (1.8%)  | 53 (53%)           | 11 (11%)          | 16 (16%)   | 20 (20%)   |
| Spending time with friends in-person                                                                                                   | 31 (6.2%)             | 27 (5.4%)  | 392 (78.1%)  | 19 (3.8%) | 6 (1.2%)   | 17 (3.4%)   | 10 (2%)   | 4 (4.8%)           | 66 (78.6%)        | 7 (8.3%)   | 7 (8.3%)   |
| Spending time with friends remotely                                                                                                    | 1 (0.2%)              | 5 (1%)     | 397 (80.4%)  | 27 (5.5%) | 37 (7.5%)  | 24 (4.9%)   | 3 (0.6%)  | 2 (2.8%)           | 58 (81.7%)        | 7 (9.9%)   | 4 (5.6%)   |
| Spending time watching TV, playing video/computer games, or using social media for educational purposes, including school/nursery work | 2 (0.4%)              | 2 (0.4%)   | 360 (71.9%)  | 42 (8.4%) | 68 (13.6%) | 23 (4.6%)   | 4 (0.8%)  | 2 (1.8%)           | 105 (92.9%)       | 2 (1.8%)   | 4 (3.5%)   |
| Spending time watching TV, playing video/computer games, or using social media for non-educational purposes                            | 4 (0.8%)              | 9 (1.8%)   | 408 (81.8%)  | 20 (4%)   | 28 (5.6%)  | 24 (4.8%)   | 6 (1.2%)  | 2 (3.4%)           | 44 (75.9%)        | 2 (3.4%)   | 10 (17.2%) |
| Spending time outside                                                                                                                  | 36 (7.1%)             | 39 (7.7%)  | 364 (71.5%)  | 35 (6.9%) | 18 (3.5%)  | 6 (1.2%)    | 11 (2.2%) | 5 (4.1%)           | 89 (73%)          | 11 (9%)    | 17 (13.9%) |
| Attending school/nursery                                                                                                               | 29 (5.7%)             | 7 (1.4%)   | 313 (61.9%)  | 4 (0.8%)  | 36 (7.1%)  | 102 (20.2%) | 15 (3%)   | 3 (3.7%)           | 65 (79.3%)        | 2 (2.4%)   | 12 (14.6%) |
| Connectedness                                                                                                                          | 4 (0.8%)              | 20 (4%)    | 456 (91%)    | 4 (0.8%)  | 1 (0.2%)   | 13 (2.6%)   | 3 (0.6%)  | 3 (10.7%)          | 14 (50%)          | 5 (17.9%)  | 6 (21.4%)  |
| Emotions                                                                                                                               | 11 (2.2%)             | 57 (11.2%) | 411 (80.4%)  | 11 (2.2%) | 3 (0.6%)   | 5 (1%)      | 13 (2.5%) | 24 (29.6%)         | 16 (19.8%)        | 10 (12.3%) | 31 (38.3%) |
| Behaviour                                                                                                                              | 5 (1%)                | 37 (7.2%)  | 438 (85.5%)  | 8 (1.6%)  | 3 (0.6%)   | 5 (1%)      | 16 (3.1%) | 16 (28.1%)         | 7 (12.3%)         | 6 (10.5%)  | 28 (49.1%) |
| Relationships                                                                                                                          | 1 (0.2%)              | 14 (2.8%)  | 481 (95.2%)  | 1 (0.2%)  | 0 (0%)     | 5 (1%)      | 3 (0.6%)  | 7 (46.7%)          | 2 (13.3%)         | 3 (20%)    | 3 (20%)    |

The differing denominators used indicate missing data.

**Table S5.** Parental-reported mood and behaviour changes due to Covid-19 and pandemic in their children, stratified by the the effect.

| Characteristic                                                                                                                         | Caused by illness itself |                 | Caused by Covid-19 pandemic |                   |
|----------------------------------------------------------------------------------------------------------------------------------------|--------------------------|-----------------|-----------------------------|-------------------|
|                                                                                                                                        | <i>Less</i>              | <i>More</i>     | <i>Less</i>                 | <i>More</i>       |
| Eating                                                                                                                                 | 23/512<br>(4.5%)         | 4/512<br>(0.8%) | 0<br>(0%)                   | 4/512<br>(0.8%)   |
| Sleeping                                                                                                                               | 18/511<br>(3.5%)         | 10/511<br>(2%)  | 6/511<br>(1.2%)             | 1/511<br>(0.2%)   |
| Physical activity                                                                                                                      | 24/512<br>(4.7%)         | 2/512<br>(0.4%) | 19/512<br>(3.7%)            | 3/512<br>(0.6%)   |
| Fatigue                                                                                                                                | 7/510<br>(1.4%)          | 46/510<br>(9%)  | 1/510<br>(0.2%)             | 10/510<br>(2%)    |
| Spending time with friends in-person                                                                                                   | 2/485<br>(0.4%)          | 2/485<br>(0.4%) | 47/485<br>(9.7%)            | 19/485<br>(3.9%)  |
| Spending time with friends remotely                                                                                                    | 2/470<br>(0.4%)          | 0<br>(0%)       | 2/470<br>(0.4%)             | 55/470<br>(11.7%) |
| Spending time watching TV, playing video/computer games, or using social media for educational purposes, including school/nursery work | 1/478<br>(0.2%)          | 1/478<br>(0.2%) | 0<br>(0%)                   | 105/478<br>(22%)  |
| Spending time watching TV, playing video/computer games, or using social media for non-educational purposes                            | 1/475<br>(0.2%)          | 1/475<br>(0.2%) | 3/475<br>(0.6%)             | 41/475<br>(8.6%)  |
| Spending time outside                                                                                                                  | 5/503<br>(1%)            | 0<br>(0%)       | 49/503<br>(9.7%)            | 39/503<br>(7.8%)  |
| Attending school/nursery                                                                                                               | 2/404<br>(0.5%)          | 1/404<br>(0.3%) | 29/404<br>(7.2%)            | 36/404<br>(8.9%)  |
| Connectedness                                                                                                                          | 2/488<br>(0.4%)          | 1/488<br>(0.2%) | 13/488<br>(2.7%)            | 1/488<br>(0.2%)   |
| Emotions                                                                                                                               | 22/511<br>(4.3%)         | 2/511<br>(0.4%) | 13/511<br>(2.5%)            | 2/511<br>(0.4%)   |
| Behaviour                                                                                                                              | 14/506<br>(2.8%)         | 1/506<br>(0.2%) | 0<br>(0%)                   | 7/506<br>(1.4%)   |
| Relationships                                                                                                                          | 7/500<br>(1.4%)          | 0<br>(0%)       | 2/500<br>(0.4%)             | 0<br>(0%)         |

The differing denominators used indicate missing data.

**Figure S1.** The proportion of COVID-19 infected children who at various time points after discharge from hospital had one or more of the commonest continuing symptoms. Some children had more than one symptom.

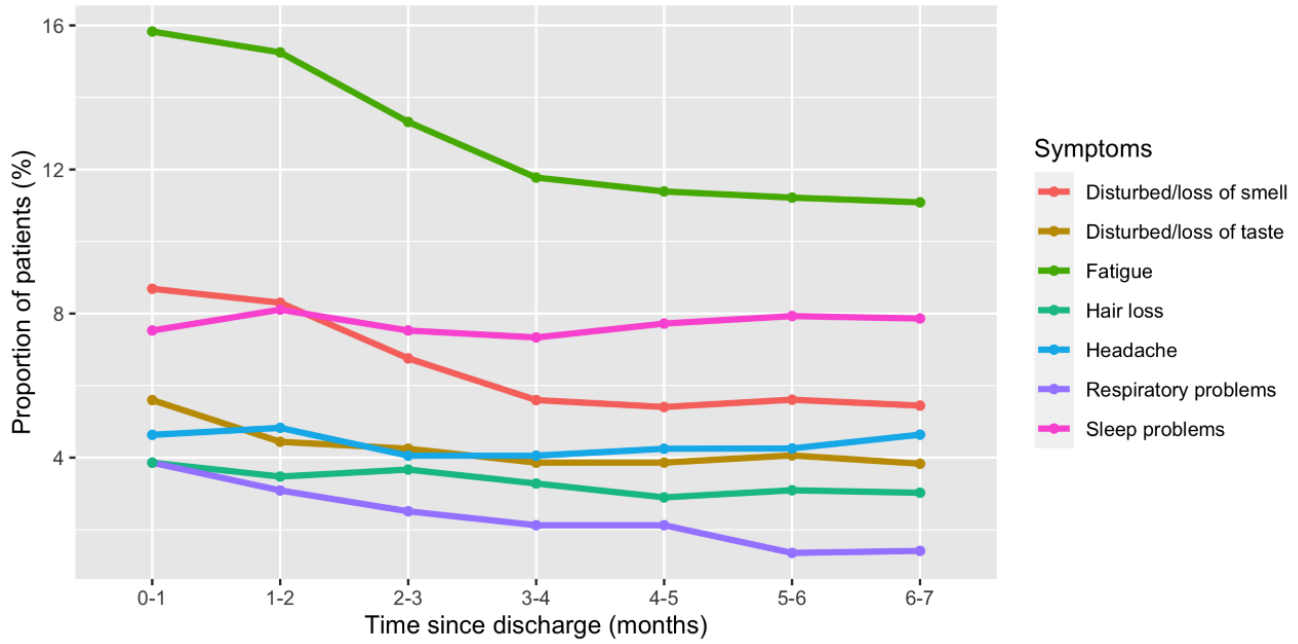

The prevalence was calculated based on responses to the following questions: “Within the last seven days, has your child had any of these symptoms, which were NOT present prior to their Covid-19 illness? (If yes, please indicate below and the duration of the symptom/s) and “Please report any symptoms that have been bothering your child since discharge that are not present today. Please specify the time of onset and duration of these symptoms.”

**Figure S2.** Multivariable logistic regression model to identify pre-existing risk factors for post-COVID condition (using age as a continuous variable). Odds ratios and 95% CIs for presence of (A) any category of persistent symptoms at the time of follow-up and (B) two or more co-existing categories of persistent symptoms at the time of the follow-up. Neurological conditions include “neurological disorders” and/or “neurodisability”. Abbreviation: CI, confidence interval.

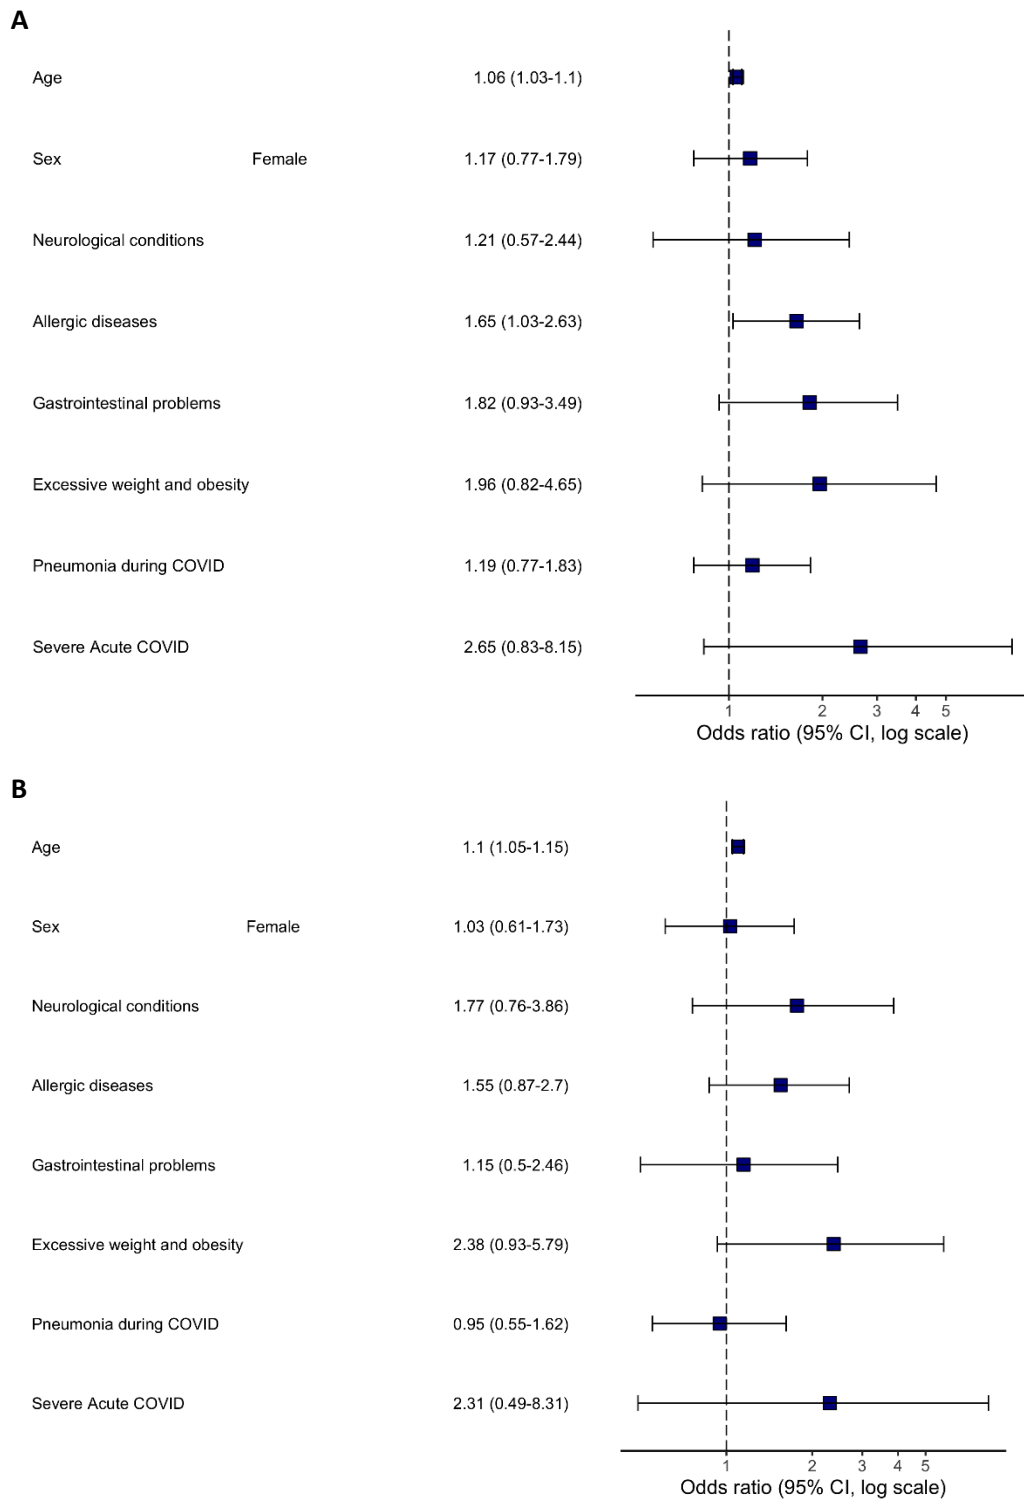



**Figure S3.** Multivariable logistic regression model to identify pre-existing risk factors for post-COVID condition (subgroup analyses in children  $\geq 6$  years of age). Odds ratios and 95% CIs for presence of (A) any category of persistent symptoms at the time of follow-up and (B) two or more co-existing categories of persistent symptoms at the time of the follow-up. Neurological conditions include “neurological disorders” and/or “neurodisability”. Abbreviation: CI, confidence interval.

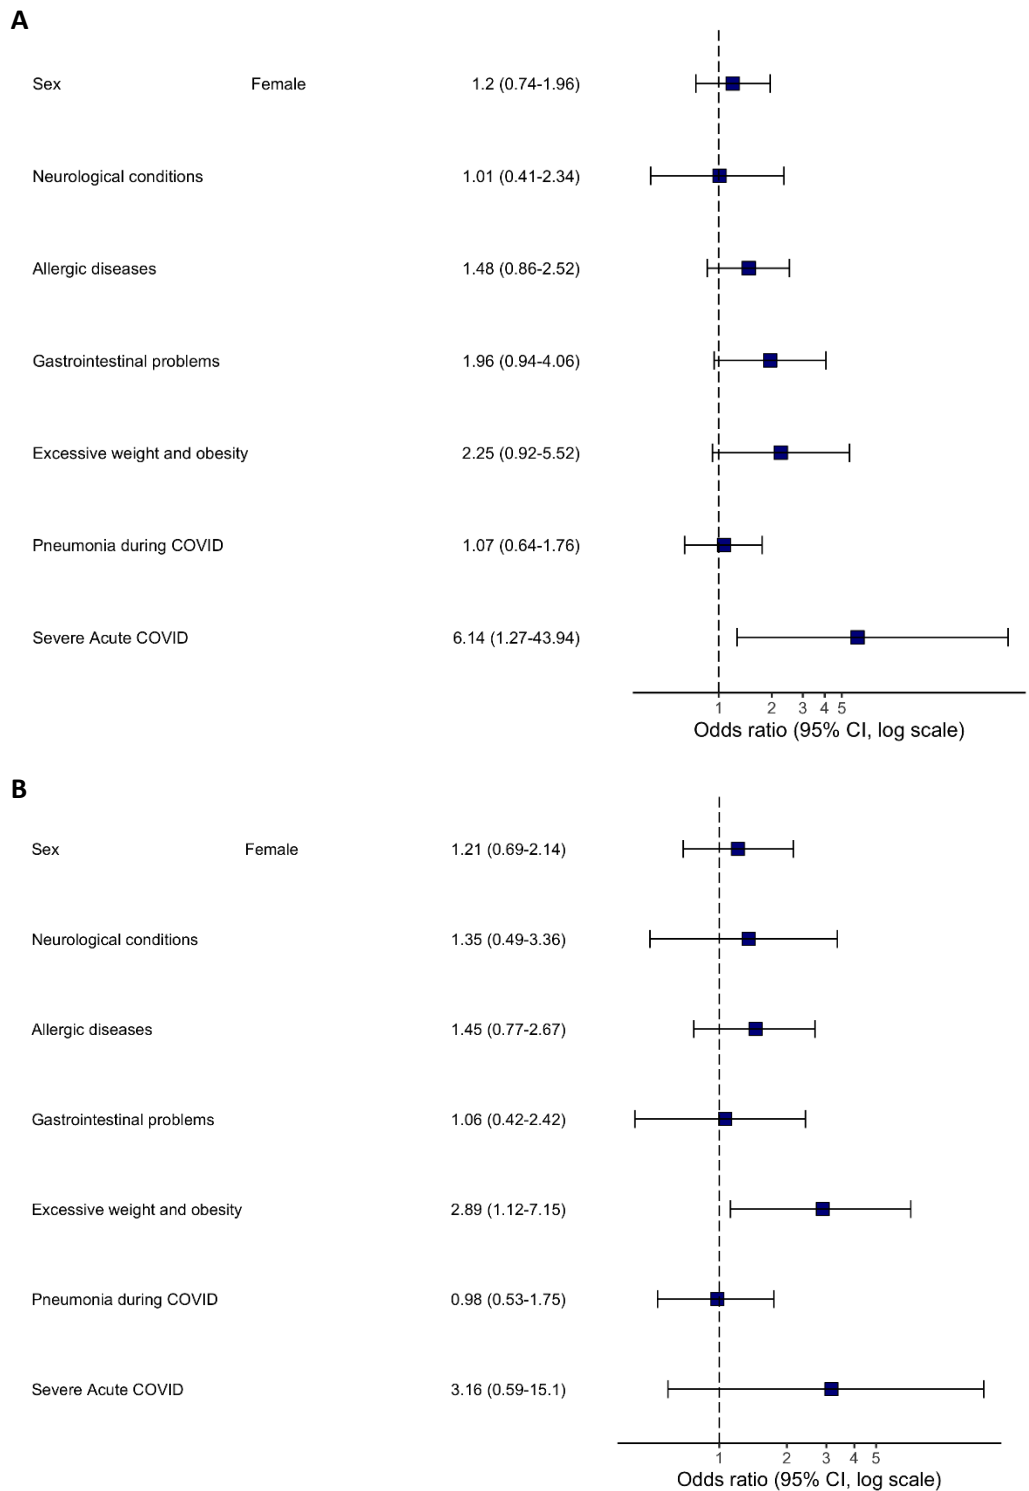

Supplement: inline-supplementary-material-1 [file inline-supplementary-material-1.pdf]
